# Supplementary material
Source: publisher site journal article supplement (https://www.spandidos-publications.com/7802/downloadSupplementary)
Supplement: Supplementary file 1 [file downloadSupplementary]

## Sheet: Table S1
Table SI. KEGG prediction of the functional pathways of high expression of CDC5L.
	ID	Description	setSize	enrichmentScore	NES	pvalue	p.adjust	qvalues	rank	leading_edge	core_enrichment
hsa00310	hsa00310	Lysine degradation	59	0.701846	1.67749	0.0001	0.000242872	8.31e-05	9876	tags=73%, list=21%, signal=58%	SETD2/ASH1L/KMT2D/KMT2E/KMT2C/KMT2A/SETD1B/EZH1/SETD1A/SETD3/NSD1/NSD2/KMT5B/EHMT1/SETDB2/ALDH9A1/SETD7/KMT5A/SUV39H2/DLD/SETDB1/NSD3/TMLHE/DOT1L/EZH2/DHTKD1/HADHA/DLST/SUV39H1/PRDM2/PLOD2/EHMT2/KMT5C/SETMAR/CAMKMT/AASS/EHHADH/COLGALT1/ALDH2/AADAT/HYKK/ALDH1B1/ALDH3A2
hsa00562	hsa00562	Inositol phosphate metabolism	73	0.661433	1.59663	0.0001	0.000242872	8.31e-05	13918	tags=82%, list=30%, signal=58%	PIK3CA/PIP5K1A/SACM1L/PIKFYVE/PIK3C2A/PIK3CB/MTMR1/SYNJ1/MTM1/PI4K2B/MTMR6/PIP4K2C/PIP4K2B/OCRL/IPMK/MTMR4/INPPL1/PLCG1/INPP5B/MTMR3/INPP5A/IMPA1/PIK3C2B/IPPK/PIK3C3/PI4KB/INPP4A/MINPP1/PTEN/INPP5E/MTMR2/PI4K2A/PLCB3/PI4KA/ALDH6A1/SYNJ2/PLCD3/FIG4/PIP5K1C/PIP4K2A/PLCE1/INPP5F/ITPK1/PLCB1/INPP5K/ITPKB/PLCH1/PLCG2/CDIPT/PIK3CG/PIK3C2G/IMPA2/MTMR14/ITPKC/INPP1/INPP5J/MTMR8/ITPKA/PLCB4/INPP4B
hsa01521	hsa01521	EGFR tyrosine kinase inhibitor resistance	79	0.648219	1.56947	0.0001	0.000242872	8.31e-05	10765	tags=63%, list=23%, signal=49%	PIK3CA/EIF4E/MAPK1/VEGFA/MAP2K1/SOS1/RAF1/GAB1/PIK3CB/SOS2/NRAS/AKT2/JAK1/PRKCA/NF1/KRAS/PLCG1/GRB2/PIK3R1/BCL2L11/BRAF/AKT1/PDGFC/MTOR/KDR/FOXO3/JAK2/IL6R/MET/STAT3/PIK3R2/PDGFB/SHC1/PTEN/RPS6KB1/BCL2L1/EGFR/MAPK3/GSK3B/PDGFD/RPS6KB2/ERBB3/PIK3R3/SRC/AKT3/BCL2/PLCG2/PDGFRB/FGFR3/IGF1R
hsa01522	hsa01522	Endocrine resistance	96	0.640673	1.56263	0.0001	0.000242872	8.31e-05	10813	tags=60%, list=23%, signal=47%	MAPK14/SP1/PIK3CA/MAPK8/MAPK1/MAP2K1/SOS1/RAF1/CDKN1B/MED1/PIK3CB/SOS2/MAPK9/NRAS/AKT2/CARM1/ADCY6/KRAS/NOTCH2/NCOA3/PRKACB/GRB2/PIK3R1/ADCY9/BRAF/E2F3/AKT1/MTOR/RB1/PTK2/NCOR1/NOTCH1/DLL4/PIK3R2/SHC1/RPS6KB1/PRKACA/JUN/CDKN2C/CDK4/EGFR/MAPK3/NOTCH3/JAG1/RPS6KB2/E2F2/PIK3R3/ADCY7/SRC/AKT3/ABCB11/BCL2/E2F1/CDKN1A/HBEGF/GNAS/IGF1R/ADCY5
hsa01524	hsa01524	Platinum drug resistance	72	0.624568	1.50681	0.0001	0.000242872	8.31e-05	10114	tags=57%, list=22%, signal=45%	POLH/PIK3CA/MAPK1/APAF1/MSH2/MLH1/PIK3CB/MSH3/PDPK1/MSH6/ATM/AKT2/CASP8/BIRC2/TOP2B/ATP7A/CASP3/PIK3R1/BRCA1/REV3L/XIAP/AKT1/FADD/SLC31A1/PIK3R2/ATP7B/BCL2L1/CASP9/MAPK3/GSTA4/XPA/CYCS/ABCC2/BAK1/FAS/PIK3R3/AKT3/BCL2/MAP3K5/GSTM4/CDKN1A
hsa03008	hsa03008	Ribosome biogenesis in eukaryotes	99	0.586585	1.43232	0.0001	0.000242872	8.31e-05	9091	tags=44%, list=19%, signal=36%	XRN2/XPO1/FCF1/XRN1/LSG1/GNL3L/CSNK2A1/UTP14C/WDR36/EFL1/NMD3/HEATR1/WDR3/UTP15/RIOK1/BMS1/SBDS/SPATA5/MPHOSPH10/GTPBP4/WDR43/DKC1/REXO1/NXT2/WDR75/CSNK2A3/UTP14A/REXO5/CSNK2B/RPP38/POP1/CSNK2A2/UTP4/AK6/GNL3/RAN/NOP58/RBM28/NOL6/RPP40/TCOF1/UTP18/NOB1/POP4
hsa03013	hsa03013	RNA transport	165	0.678097	1.68551	0.0001	0.000242872	8.31e-05	10640	tags=68%, list=23%, signal=53%	NUP153/NUP160/SENP2/SRRM1/KPNB1/EIF3A/POM121/GEMIN5/XPO1/EIF4E/EIF4G2/NUP98/NUP107/RANBP2/FXR1/RPP14/UPF2/SUMO2/DDX20/EIF4A2/XPOT/NUP54/EIF1AX/PHAX/EIF2S3/NMD3/POM121C/THOC2/EIF4B/EIF2B1/NUP58/TPR/CYFIP1/CASC3/EIF1B/EIF3J/NUP35/PNN/RAE1/EIF2S1/RNPS1/FMR1/AAAS/TGS1/NUP42/NDC1/SEH1L/NUP188/EIF4G3/SUMO1/NUP50/NCBP2/ELAC1/SMN1/NUP62/NXT2/EIF4EBP2/NUP155/EIF5/GEMIN2/XPO5/UPF3B/SNUPN/UPF3A/NUP133/UBE2I…
hsa03015	hsa03015	mRNA surveillance pathway	91	0.659758	1.6063	0.0001	0.000242872	8.31e-05	10938	tags=69%, list=23%, signal=53%	PPP2R5D/CSTF2T/SRRM1/WDR82/PPP2CA/SMG1/CPSF7/UPF2/WDR33/CPSF2/PPP1CB/PCF11/PAPOLG/CLP1/CSTF1/GSPT1/SMG7/CPSF6/PPP1CC/CASC3/PNN/RNPS1/CSTF2/PPP2R5E/PAPOLA/HBS1L/ETF1/FIP1L1/NCBP2/PPP2R2A/NXT2/NUDT21/UPF3B/UPF3A/ACIN1/PPP2R5A/RNGTT/UPF1/CSTF3/BCL2L2-PABPN1/PPP2R2D/PPP2R5B/NCBP1/DAZAP1/MAGOH/DDX39B/PPP2CB/SMG5/PABPC4L/EIF4A3/SAP18/SMG6/CPSF4/PYM1/PABPC3/RBM8A/NXF5/MAGOHB/MSI2/CPSF3/PPP2R3A/PELO/ALYR…
hsa03018	hsa03018	RNA degradation	79	0.69223	1.67603	0.0001	0.000242872	8.31e-05	9904	tags=68%, list=21%, signal=54%	DDX6/XRN2/MTREX/CNOT8/PATL1/TTC37/XRN1/DHX36/DIS3L/CNOT4/CNOT2/CNOT1/C1D/DIS3/PNPT1/EDC3/PAN3/PARN/CNOT6L/CNOT7/TOB2/TENT4B/TENT4A/PAN2/CNOT9/DCP1B/DCP1A/ZCCHC7/BTG3/LSM6/EXOSC3/CNOT6/EXOSC2/DCP2/TOB1/EXOSC10/CNOT10/BTG1/WDR61/LSM1/NUDT16/PFKM/EXOSC9/PABPC4L/CNOT3/MPHOSPH6/HSPD1/LSM3/EXOSC8/EXOSC6/LSM2/PABPC3/LSM8/PFKL
hsa03040	hsa03040	Spliceosome	133	0.685983	1.69349	0.0001	0.000242872	8.31e-05	9851	tags=69%, list=21%, signal=55%	HNRNPK/SF3A1/DDX46/WBP11/SRSF3/DHX16/SMNDC1/SNRNP27/TRA2B/ISY1-RAB43/HNRNPU/DDX23/SRSF4/SRSF10/SF3B1/U2AF2/SNRNP200/RBMX/SRSF1/PRPF18/RBM25/PCBP1/DDX5/HSPA1L/THOC2/HNRNPA1/SNW1/BCAS2/CHERP/PRPF40A/U2SURP/RBMXL1/SF3A3/DDX42/PRPF38B/SRSF2/SRSF6/HNRNPM/AQR/HNRNPC/CDC40/PRPF4/TCERG1/DHX15/NCBP2/PRPF38A/LSM6/SF3B3/SNRPB2/PPIL1/USP39/ACIN1/PHF5A/SRSF5/PRPF40B/SRSF7/SF3B4/RBM22/ZMAT2/SYF2/SRSF9/TRA2A/RB…
hsa04010	hsa04010	MAPK signaling pathway	294	0.576719	1.45519	0.0001	0.000242872	8.31e-05	12337	tags=53%, list=26%, signal=40%	MAPK14/PPP3R1/TRAF6/RASA1/MAP3K2/TAOK3/ATF2/MAPK8/MAPK1/RASA2/VEGFA/DAXX/MAP2K1/SOS1/RAF1/PAK2/SOS2/NFATC3/TAOK1/MAPK9/RAPGEF2/TAOK2/NRAS/STK4/MAP4K3/PPM1A/CRKL/MAP3K3/MAP3K13/HSPA1L/ELK1/AKT2/SRF/TAB2/CHUK/ELK4/PRKCA/CDC42/RPS6KA3/NF1/NFKB1/PPM1B/IRAK4/RAP1A/KRAS/MAP4K4/TAB1/RAP1B/DUSP7/MYD88/MAPKAPK5/MAP2K7/LAMTOR3/TGFBR2/PRKACB/CASP3/GRB2/PPP3CB/PPP5C/FLT1/MAP2K4/RPS6KA5/NLK/RELA/BRAF/MAP3K1/A…
hsa04012	hsa04012	ErbB signaling pathway	85	0.665952	1.61706	0.0001	0.000242872	8.31e-05	10364	tags=65%, list=22%, signal=51%	PIK3CA/NCK1/STAT5B/MAPK8/MAPK1/MAP2K1/SOS1/RAF1/GAB1/CDKN1B/PAK2/PIK3CB/SOS2/MAPK9/CAMK2G/NRAS/CRKL/CAMK2D/ELK1/AKT2/ABL1/PRKCA/KRAS/ABL2/PLCG1/MAP2K7/GRB2/PIK3R1/MAP2K4/BRAF/AKT1/CBLB/MTOR/CBL/PAK1/PAK4/PTK2/PIK3R2/SHC1/RPS6KB1/JUN/CRK/EGFR/MAPK3/GSK3B/RPS6KB2/ERBB3/PIK3R3/SRC/BTC/AKT3/NCK2/PLCG2/CDKN1A/HBEGF
hsa04014	hsa04014	Ras signaling pathway	232	0.60869	1.52735	0.0001	0.000242872	8.31e-05	10110	tags=48%, list=21%, signal=38%	EXOC2/RASA1/PIK3CA/RAB5A/MAPK8/MAPK1/TBK1/RASA2/VEGFA/RAB5B/MAP2K1/SOS1/RAF1/PTPN11/RAB5C/GAB1/PAK2/PIK3CB/SOS2/MAPK9/RALBP1/NRAS/STK4/ELK1/AKT2/ARF6/CHUK/FOXO4/ABL1/PRKCA/CDC42/NF1/RHOA/NFKB1/AFDN/RAP1A/SHOC2/KRAS/RAP1B/RASAL2/ABL2/PLCG1/RGL2/PRKACB/GRB2/PIK3R1/GAB2/REL/FLT1/GNB1/RELA/BRAP/AKT1/PDGFC/KDR/KITLG/PAK1/JMJD7-PLA2G4B/RALA/PAK4/SYNGAP1/MET/RRAS2/RALB/RAPGEF5/CALM2/KSR1/ETS1/PIK3R2/GNG…
hsa04015	hsa04015	Rap1 signaling pathway	210	0.586655	1.46839	0.0001	0.000242872	8.31e-05	14081	tags=60%, list=30%, signal=43%	MAPK14/PIK3CA/CTNND1/MAPK1/VEGFA/CTNNB1/MAP2K1/RAF1/KRIT1/PIK3CB/RAPGEF2/NRAS/MAGI3/CRKL/PRKD3/AKT2/GNAI3/PRKCA/CDC42/RAPGEF6/RHOA/AFDN/ADCY6/RAP1A/MAGI1/GNAI1/KRAS/GNAQ/ITGB1/RAP1B/RAPGEF1/PRKCI/TLN1/PLCG1/PIK3R1/FLT1/SIPA1L3/DOCK4/ADCY9/BRAF/ENAH/AKT1/PDGFC/KDR/KITLG/RALA/PARD6B/GNAI2/MET/VAV2/RALB/RAPGEF5/PARD3/CALM2/PIK3R2/SIPA1L1/PDGFB/CALM1/ANGPT2/PLCB3/RASSF5/FARP2/P2RY1/CALM3/INSR/CRK/RAS…
hsa04022	hsa04022	cGMP-PKG signaling pathway	166	0.574068	1.42714	0.0001	0.000242872	8.31e-05	14144	tags=59%, list=30%, signal=41%	ATF6B/PPP3R1/GTF2I/ATF2/MAPK1/ROCK1/MAP2K1/RAF1/PPP1CB/NFATC3/PPP1R12A/ATP2A2/CREB1/ROCK2/GNA13/MEF2A/AKT2/SRF/GNAI3/PPP1CC/GNA11/RHOA/ADCY6/GNAI1/GNAQ/MYLK/BORCS8-MEF2B/ATP2B1/PPP3CB/CREB3L2/ADCY9/MEF2D/AKT1/ITPR2/PPP3CA/CREB3L4/VDAC2/GNAI2/GNA12/GATA4/CALM2/EDNRB/MEF2C/IRS1/SLC25A5/PDE3B/CALM1/ATP1B1/VDAC1/PLCB3/CALM3/INSR/ITPR1/NFATC2/ATP1A1/MAPK3/PPP3CC/GUCY1B1/VDAC3/GUCY1A1/MYLK4/IRS2/TRPC6/…
hsa04062	hsa04062	Chemokine signaling pathway	187	0.543537	1.35609	0.0001	0.000242872	8.31e-05	14092	tags=51%, list=30%, signal=36%	PIK3CA/STAT5B/MAPK1/ROCK1/MAP2K1/SOS1/RAF1/PIK3CB/SOS2/ROCK2/NRAS/CRKL/AKT2/GNAI3/CHUK/CDC42/RHOA/NFKB1/ADCY6/RAP1A/GNAI1/KRAS/RAP1B/PRKACB/GRB2/PIK3R1/PXN/GNB1/RELA/ADCY9/BRAF/AKT1/STAT2/FOXO3/JAK2/PAK1/PTK2/GNAI2/VAV2/STAT3/PARD3/GSK3A/PIK3R2/GRK2/GNG12/SHC1/PRKACA/LYN/PLCB3/GNG10/CRK/MAPK3/ELMO1/GSK3B/BCAR1/NFKBIA/PTK2B/PRKCD/CX3CR1/GRK6/GRK5/PIK3R3/ADCY7/STAT1/PLCB1/GNB5/VAV3/SRC/GNB2/AKT3/GN…
hsa04064	hsa04064	NF-kappa B signaling pathway	100	0.588827	1.43819	0.0001	0.000242872	8.31e-05	10380	tags=51%, list=22%, signal=40%	RIPK1/TRAF6/CSNK2A1/TIRAP/ERC1/TAB3/ATM/TAB2/PIAS4/CHUK/NFKB1/BIRC2/IRAK4/MALT1/TAB1/MYD88/BCL10/PLCG1/PARP1/RELA/XIAP/CFLAR/UBE2I/MAP3K7/TRIM25/CSNK2A3/CYLD/TICAM1/DDX58/CSNK2B/CSNK2A2/TNFAIP3/BCL2L1/LYN/TRAF3/IL1R1/NFKBIA/TLR4/MAP3K14/TICAM2/TRAF1/TNFRSF1A/BLNK/PIDD1/BCL2/LTBR/PLAU/IKBKB/PLCG2/TRAF5/TRAF2
hsa04066	hsa04066	HIF-1 signaling pathway	109	0.591008	1.44852	0.0001	0.000242872	8.31e-05	10964	tags=54%, list=23%, signal=42%	CUL2/EP300/CREBBP/VHL/PIK3CA/EIF4E/MAPK1/VEGFA/ARNT/MAP2K1/CDKN1B/PIK3CB/CAMK2G/CAMK2D/AKT2/PRKCA/NFKB1/PLCG1/PIK3R1/EGLN1/FLT1/RELA/HIF1A/AKT1/TFRC/MTOR/MKNK1/IL6R/STAT3/PGK1/PIK3R2/RPS6KB1/PDHB/LDHA/ANGPT2/INSR/EGFR/MAPK3/TLR4/PFKM/RPS6KB2/IFNGR2/ANGPT1/PIK3R3/NOS3/EDN1/PFKFB3/AKT3/IFNGR1/BCL2/LTBR/PDHA1/PFKL/PLCG2/CDKN1A/SLC2A1/IGF1R/PDK1/TEK
hsa04068	hsa04068	FoxO signaling pathway	128	0.659378	1.62528	0.0001	0.000242872	8.31e-05	10114	tags=62%, list=22%, signal=49%	MAPK14/SIRT1/USP7/EP300/CREBBP/SMAD4/PIK3CA/MAPK8/MAPK1/MAP2K1/CDK2/SOS1/RAF1/CDKN1B/PIK3CB/SOS2/MAPK9/RBL2/PDPK1/NRAS/STK4/ATM/AKT2/CHUK/FOXO4/PRKAA1/SMAD3/PRKAG1/KRAS/CCNG2/TGFBR2/GRB2/PIK3R1/SETD7/NLK/SGK3/BCL2L11/BRAF/AKT1/FOXO3/PRKAB2/S1PR1/CDKN2B/STAT3/TGFBR1/STK11/BCL6/SKP2/PLK2/PIK3R2/IRS1/PLK4/PTEN/GABARAPL2/CSNK1E/INSR/PRKAG2/ATG12/EGFR/PRKAB1/MAPK3/TNFSF10/PLK1/HOMER2/PRKAA2/CCNB2/IRS2…
hsa04070	hsa04070	Phosphatidylinositol signaling system	98	0.666319	1.62632	0.0001	0.000242872	8.31e-05	13918	tags=83%, list=30%, signal=58%	PIK3CA/PIP5K1A/PPIP5K2/SACM1L/PIKFYVE/PIK3C2A/PIK3CB/MTMR1/SYNJ1/MTM1/PI4K2B/MTMR6/PIP4K2C/PIP4K2B/PRKCA/OCRL/IPMK/MTMR4/INPPL1/PLCG1/PIK3R1/IP6K1/INPP5B/PPIP5K1/MTMR3/INPP5A/IMPA1/ITPR2/PIK3C2B/PIP4P1/DGKD/IPPK/PIK3C3/PI4KB/INPP4A/CALM2/CDS2/PIK3R2/DGKQ/PTEN/INPP5E/CALM1/MTMR2/IP6K2/PI4K2A/DGKZ/PLCB3/CALM3/ITPR1/PI4KA/SYNJ2/PLCD3/DGKH/PIP5K1C/PIP4K2A/PLCE1/PIK3R3/INPP5F/ITPK1/PLCB1/INPP5K/ITPKB/…
hsa04071	hsa04071	Sphingolipid signaling pathway	119	0.621159	1.52785	0.0001	0.000242872	8.31e-05	9628	tags=55%, list=20%, signal=44%	PPP2R5D/MAPK14/PIK3CA/MAPK8/MAPK1/ROCK1/PPP2CA/MAP2K1/RAF1/SPTLC1/PIK3CB/MAPK9/ROCK2/PDPK1/NRAS/SGMS1/CERS2/GNA13/AKT2/GNAI3/PRKCA/SGPL1/RHOA/NFKB1/GNAI1/KRAS/GNAQ/PPP2R5E/PIK3R1/GAB2/RELA/PPP2R2A/AKT1/PPP2R5A/GNAI2/GNA12/S1PR1/SGMS2/PPP2R2D/SPTLC2/SPHK2/PPP2R5B/ACER2/SGPP1/PIK3R2/PTEN/CERS6/PLCB3/PPP2CB/DEGS1/MAPK3/SPTLC3/PLD2/PRKCE/NSMAF/TNFRSF1A/PIK3R3/ASAH1/PLCB1/ASAH2/NOS3/AKT3/BCL2/MAP3K5/P…
hsa04072	hsa04072	Phospholipase D signaling pathway	147	0.581347	1.4398	0.0001	0.000242872	8.31e-05	11504	tags=54%, list=24%, signal=41%	PIK3CA/PIP5K1A/MAPK1/MAP2K1/SOS1/RAF1/PTPN11/GAB1/PIK3CB/SOS2/NRAS/GNA13/AKT2/ARF6/PRKCA/RHOA/ADCY6/AGPAT1/KRAS/AGPAT3/PLCG1/RHEB/GRB2/PIK3R1/GAB2/ADCY9/TSC1/PLPP3/AKT1/DNM2/PDGFC/MTOR/ARF1/KITLG/DGKD/JMJD7-PLA2G4B/RALA/GNA12/RRAS2/RALB/CYTH3/CYTH1/SPHK2/PIK3R2/PDGFB/DGKQ/SHC1/DGKZ/PLCB3/INSR/EGFR/MAPK3/RALGDS/F2R/PTK2B/DGKH/PLD2/RAPGEF4/TSC2/PIP5K1C/CYTH2/PDGFD/AGPAT5/PIK3R3/ADCY7/PLCB1/MRAS/AKT…
hsa04110	hsa04110	Cell cycle	124	0.699599	1.7227	0.0001	0.000242872	8.31e-05	10114	tags=74%, list=22%, signal=58%	STAG1/SMC3/SMC1A/EP300/CREBBP/SMAD4/CDC23/CDC27/STAG2/CDK2/ORC4/CDKN1B/RBL2/MCM3/SMAD2/ORC2/ATM/PRKDC/FZR1/ABL1/ANAPC10/SMAD3/YWHAG/RAD21/BUB3/YWHAQ/WEE1/PCNA/CUL1/ANAPC13/MCM4/CCNE2/E2F3/DBF4/MCM2/ORC3/ANAPC1/MCM6/YWHAB/ANAPC4/RB1/RBL1/HDAC2/MCM5/ESPL1/CDC6/YWHAH/CDC14A/E2F4/BUB1/CDKN2B/ANAPC2/SKP1/HDAC1/ORC5/SKP2/MAD2L1/BUB1B/TFDP1/CDC7/CDC14B/CDKN2C/YWHAE/CDK1/CDK4/ORC1/ANAPC7/CCNA2/CDC16/TTK/…
hsa04114	hsa04114	Oocyte meiosis	128	0.66562	1.64066	0.0001	0.000242872	8.31e-05	7044	tags=55%, list=15%, signal=47%	PPP2R5D/MAPK14/SMC3/PPP3R1/SMC1A/CDC23/SLK/MAPK1/CDC27/PPP2CA/MAP2K1/CDK2/PPP1CB/CAMK2G/FBXW11/CAMK2D/PPP1CC/RPS6KA3/ANAPC10/CPEB2/ADCY6/BTRC/YWHAG/PPP2R5E/YWHAQ/CPEB4/SPDYE16/PRKACB/PPP3CB/CUL1/ANAPC13/SPDYE3/ADCY9/CCNE2/ITPR2/ANAPC1/PPP3CA/YWHAB/ANAPC4/PPP2R5A/FBXO5/ESPL1/YWHAH/BUB1/ANAPC2/SKP1/SPDYE2/PPP2R5B/CALM2/MAD2L1/SPDYE1/SGO1/PRKACA/CALM1/SPDYE6/SPDYE5/YWHAE/CDK1/PPP2CB/ANAPC7/CDC16/CAL…
hsa04120	hsa04120	Ubiquitin mediated proteolysis	137	0.751929	1.85843	0.0001	0.000242872	8.31e-05	6205	tags=67%, list=13%, signal=58%	CUL2/UBE3A/BIRC6/TRAF6/UBE2N/VHL/ITCH/CDC23/UBE3B/UBA3/UBE2Q1/CDC27/TRIP12/UBA2/CUL5/CUL4A/HERC1/UBE4B/UBE3C/CUL7/HERC3/NHLRC1/FBXW11/UBE2O/FBXW8/PIAS3/HUWE1/FZR1/UBE4A/KLHL9/SIAH1/PIAS4/UBE2G2/MGRN1/TRIM32/SMURF2/CUL4B/ANAPC10/RCHY1/UBA6/BIRC2/BTRC/UBE2D3/SMURF1/PIAS2/UBE2G1/HERC2/HERC4/UBE2E3/ERCC8/UBE2J1/WWP2/CUL1/ANAPC13/WWP1/UBE2A/DET1/NEDD4/BRCA1/TRIM37/XIAP/UBE2W/MAP3K1/UBE2Z/UBE2H/PIAS1/U…
hsa04137	hsa04137	Mitophagy - animal	65	0.699972	1.68053	0.0001	0.000242872	8.31e-05	10354	tags=75%, list=22%, signal=59%	RHOT1/USP8/CALCOCO2/SP1/NBR1/MFN1/AMBRA1/MAPK8/TBK1/EIF2AK3/RAB7A/TBC1D15/MAPK9/CSNK2A1/TAX1BP1/NRAS/MFN2/BCL2L13/KRAS/TFE3/RELA/HIF1A/BECN1/ATG9A/CSNK2A3/ATG5/FOXO3/BNIP3L/ULK1/RRAS2/CITED2/USP30/PGAM5/CSNK2B/CSNK2A2/BCL2L1/GABARAPL2/JUN/TBC1D17/BNIP3/TOMM7/FUNDC1/USP15/MRAS/SRC/UBB/E2F1/MITF/RHOT2
hsa04140	hsa04140	Autophagy - animal	128	0.726732	1.7913	0.0001	0.000242872	8.31e-05	9683	tags=77%, list=21%, signal=62%	TRAF6/UVRAG/PIK3CA/AMBRA1/MAPK8/MAPK1/PPP2CA/MAP2K1/STX17/RAF1/EIF2AK3/RAB7A/PIK3CB/MAPK9/PDPK1/ATG4C/NRAS/HMGB1/AKT2/PIK3R4/ATG3/RPTOR/PRKAA1/EIF2S1/KRAS/MTMR4/ATG14/ATG16L1/ATG2B/DAPK1/RUBCN/RHEB/PRKACB/PIK3R1/RRAGC/CAMKK2/MTMR3/RRAGA/NRBF2/ERN1/TSC1/HIF1A/BECN1/CFLAR/RRAGB/WIPI2/AKT1/RAB33B/MAP3K7/ATG9A/VMP1/MTOR/ZFYVE1/ATG5/RB1CC1/SH3GLB1/LAMP2/PIK3C3/SUPT20H/ULK1/IGBP1/RRAS2/STK11/PIK3R2/IRS…
hsa04141	hsa04141	Protein processing in endoplasmic reticulum	163	0.665697	1.65392	0.0001	0.000242872	8.31e-05	9594	tags=66%, list=20%, signal=52%	ATF6B/GANAB/SSR1/TXNDC5/MAPK8/STT3B/SEC24C/MBTPS2/EIF2AK3/RAD23B/UBE4B/NFE2L2/MAPK9/UBQLN1/EIF2AK2/SEC23B/SEC24A/PLAA/HSPA1L/HSP90AB1/RNF5/ERLEC1/SEC23A/UBE2G2/ATF6/CANX/EIF2AK1/LMAN1/SEL1L/UBQLN2/EIF2S1/UBE2D3/SEC31A/SEC24D/MAN1A2/MBTPS1/MOGS/DNAJC3/UBE2G1/MAP2K7/UBE2J1/CUL1/VCP/SEC24B/NSFL1C/RPN1/EDEM1/YOD1/ERN1/STT3A/DNAJA2/DNAJC10/RNF185/NPLOC4/PDIA6/SYVN1/RAD23A/EDEM3/DDOST/SAR1B/SKP1/NGLY1/…
hsa04142	hsa04142	Lysosome	123	0.61809	1.52153	0.0001	0.000242872	8.31e-05	11496	tags=60%, list=24%, signal=46%	AP3M1/GGA3/AP1G1/AP4E1/CLTC/SLC11A2/LAPTM4A/AP3S2/SCARB2/HGSNAT/TPP1/ATP6V0A2/GGA2/MFSD8/NEU1/GNS/GLB1/LIPA/PPT2/NPC1/NAGA/MANBA/IGF2R/ENTPD4/LAMP2/AP3S1/SUMF1/CD164/AP3D1/SLC17A5/CLN5/AP1S2/AP3M2/IDS/AP1S3/AP3B1/AP1B1/CTSO/LAMP1/AP1M1/AP4S1/LITAF/GALC/AP4B1/GGA1/CTNS/ARSB/FUCA1/ATP6AP1/AP1S1/GUSB/PPT1/GNPTAB/AGA/CTSH/CTSS/ASAH1/ABCB9/GM2A/DNASE2/LAMP3/SORT1/CTSB/GAA/IDUA/GALNS/PSAP/ATP6V0D1/PLA2…
hsa04144	hsa04144	Endocytosis	243	0.664805	1.66983	0.0001	0.000242872	8.31e-05	10766	tags=67%, list=23%, signal=52%	SNX4/TSG101/USP8/TRAF6/PDCD6IP/ZFYVE9/RNF41/ARFGEF2/ITCH/PIP5K1A/WIPF2/RAB5A/WASL/ACAP2/RAB5B/SNX6/RBSN/STAM/EEA1/CHMP5/VPS35/RAB7A/RAB5C/CHMP2B/GBF1/STAM2/STAMBP/VPS4B/SMAD2/VPS26A/GIT2/WASHC4/RAB11FIP2/VTA1/HSPA1L/ZFYVE16/ARF6/RAB22A/CAPZA2/WASHC2C/EPS15/KIF5B/SNX2/CDC42/CLTC/RAB10/SMURF2/RHOA/SMAD3/RAB8A/CAPZA1/CHMP1B/AP2B1/SNX1/IST1/ARPC5/SMURF1/RAB35/PRKCI/WASHC2A/SPG21/VPS26B/TGFBR2/ARFGAP3…
hsa04150	hsa04150	mTOR signaling pathway	152	0.656531	1.62792	0.0001	0.000242872	8.31e-05	8505	tags=57%, list=18%, signal=47%	PIK3CA/ATP6V1A/EIF4E/MAPK1/TTI1/MAP2K1/SOS1/CAB39/RAF1/PIK3CB/SOS2/PDPK1/NRAS/CLIP1/DVL3/FNIP1/AKT2/MIOS/EIF4B/CHUK/PRKCA/RPS6KA3/RICTOR/RPTOR/RHOA/PRKAA1/KRAS/SLC38A9/DVL2/FLCN/SEH1L/LAMTOR3/RHEB/LRP6/GRB2/PIK3R1/FZD5/RRAGC/CASTOR2/RRAGA/STRADB/BRAF/TSC1/RRAGB/AKT1/MTOR/GRB10/WDR59/WDR24/ULK1/NPRL3/ATP6V1D/STK11/SKP2/PIK3R2/STRADA/IRS1/PTEN/RPS6KB1/FZD4/ATP6V1B2/ATP6V1C1/FNIP2/DEPDC5/INSR/SEC13/…
hsa04151	hsa04151	PI3K-Akt signaling pathway	348	0.549881	1.39208	0.0001	0.000242872	8.31e-05	14189	tags=55%, list=30%, signal=39%	PPP2R5D/ATF6B/PIK3CA/ATF2/EIF4E/MAPK1/VEGFA/PPP2CA/PKN2/MAP2K1/CDK2/SOS1/RAF1/CDKN1B/PIK3CB/SOS2/RBL2/CREB1/PDPK1/NRAS/AKT2/HSP90AB1/JAK1/EIF4B/CHUK/PRKCA/RPTOR/NFKB1/PRKAA1/YWHAG/MAGI1/KRAS/ITGB1/PPP2R5E/YWHAQ/PHLPP1/RHEB/GRB2/PIK3R1/CREB3L2/FLT1/GNB1/BRCA1/RELA/CCNE2/SGK3/BCL2L11/PPP2R2A/TSC1/ITGA6/AKT1/PDGFC/YWHAB/MTOR/KDR/FOXO3/JAK2/PPP2R5A/KITLG/PHLPP2/CREB3L4/PTK2/PRLR/YWHAH/IL6R/MET/LAMC1/…
hsa04152	hsa04152	AMPK signaling pathway	119	0.630599	1.55107	0.0001	0.000242872	8.31e-05	10765	tags=61%, list=23%, signal=47%	PPP2R5D/SIRT1/PIK3CA/PPP2CA/CAB39/PIK3CB/CREB1/PDPK1/EEF2K/AKT2/ADIPOR1/RAB10/RPTOR/PRKAA1/RAB8A/ELAVL1/PRKAG1/PPP2R5E/RAB14/RHEB/PIK3R1/CREB3L2/CAMKK2/PPP2R2A/STRADB/TSC1/AKT1/MAP3K7/ADIPOR2/MTOR/FOXO3/PPP2R5A/CREB3L4/PRKAB2/HMGCR/ULK1/PPP2R2D/PPP2R5B/STK11/PIK3R2/STRADA/IRS1/RPS6KB1/ACACA/HNF4A/PPP2CB/CCNA2/INSR/PFKFB2/PRKAG2/PRKAB1/CRTC2/CPT1A/RAB11B/TSC2/PFKM/RPS6KB2/PRKAA2/IRS2/CD36/FOXO1/GY…
hsa04210	hsa04210	Apoptosis	136	0.632644	1.56321	0.0001	0.000242872	8.31e-05	9453	tags=58%, list=20%, signal=47%	RIPK1/PIK3CA/MAPK8/MAPK1/DAXX/APAF1/MAP2K1/RAF1/EIF2AK3/PIK3CB/MAPK9/PARP4/PDPK1/NRAS/ATM/AKT2/CASP8/PARP2/CHUK/NFKB1/BIRC2/EIF2S1/KRAS/TUBA1B/CASP2/LMNB1/CASP3/PIK3R1/PARP1/CASP7/TUBA1C/RELA/PARP3/XIAP/BCL2L11/ERN1/CFLAR/AKT1/FADD/ITPR2/CASP10/CASP6/DIABLO/CTSO/PIK3R2/LMNB2/DFFA/TNFRSF10B/BCL2L1/JUN/DAB2IP/MCL1/ITPR1/CASP9/MAPK3/NFKBIA/TNFSF10/MAP3K14/HTRA2/CYCS/TNFRSF10A/TRAF1/BAK1/CAPN1/FAS/CT…
hsa04211	hsa04211	Longevity regulating pathway	89	0.684318	1.66478	0.0001	0.000242872	8.31e-05	9419	tags=65%, list=20%, signal=52%	ATF6B/SIRT1/PIK3CA/ATF2/EIF4E/PIK3CB/CREB1/APPL1/NRAS/AKT2/ADIPOR1/RPTOR/NFKB1/PRKAA1/PRKAG1/ADCY6/KRAS/EHMT1/RHEB/PRKACB/PIK3R1/CREB3L2/CAMKK2/RELA/ADCY9/TSC1/AKT1/ADIPOR2/MTOR/ATG5/FOXO3/RB1CC1/CREB3L4/PRKAB2/ULK1/STK11/PIK3R2/IRS1/ATG13/RPS6KB1/PRKACA/EHMT2/INSR/PRKAG2/PRKAB1/ATG101/TSC2/RPS6KB2/PRKAA2/IRS2/FOXO1/CAT/PIK3R3/ADCY7/SESN3/AKT3/KL/SESN1
hsa04217	hsa04217	Necroptosis	133	0.601134	1.48403	0.0001	0.000242872	8.31e-05	10380	tags=53%, list=22%, signal=42%	RIPK1/STAT5B/MAPK8/TRPM7/CHMP5/CHMP2B/MAPK9/PARP4/EIF2AK2/CAMK2G/VPS4B/CAMK2D/HMGB1/HSP90AB1/JAK1/CASP8/PARP2/BIRC2/CHMP1B/DNM1L/FAF1/PARP1/PARP3/SPATA2/XIAP/CFLAR/FADD/STAT2/USP21/JAK2/CYLD/JMJD7-PLA2G4B/VDAC2/TICAM1/STAT3/IFNAR1/PGAM5/CHMP7/SLC25A5/TNFAIP3/TNFRSF10B/STAT6/TLR3/VDAC1/CHMP3/GLUL/GLUD2/TNFSF10/TLR4/PPID/HSP90AA1/VDAC3/IFNGR2/TICAM2/TNFRSF10A/CAPN1/FAS/TNFRSF1A/STAT1/SLC25A4/CAPN2/…
hsa04218	hsa04218	Cellular senescence	158	0.663476	1.647	0.0001	0.000242872	8.31e-05	10114	tags=65%, list=22%, signal=51%	MAPK14/RBBP4/SIRT1/PPP3R1/PIK3CA/HIPK1/MAPK1/TRPM7/MAP2K1/CDK2/RAF1/LIN54/PPP1CB/PIK3CB/NFATC3/RBL2/FBXW11/SMAD2/NRAS/MRE11/ATM/HIPK3/AKT2/RAD50/PPP1CC/LIN52/LIN9/NFKB1/SMAD3/BTRC/RAD1/KRAS/RHEB/TGFBR2/PIK3R1/PPP3CB/HIPK2/ZFP36L1/RELA/CCNE2/E2F3/TSC1/AKT1/ITPR2/PPP3CA/MTOR/FOXO3/RB1/HUS1/RBL1/VDAC2/E2F4/CDKN2B/RRAS2/TGFBR1/GATA4/CALM2/ETS1/PIK3R2/FOXM1/SLC25A5/NBN/PTEN/CALM1/RAD9B/VDAC1/MAPKAPK2/…
hsa04261	hsa04261	Adrenergic signaling in cardiomyocytes	149	0.556298	1.37866	0.0001	0.000242872	8.31e-05	14189	tags=52%, list=30%, signal=37%	PPP2R5D/ATF6B/MAPK14/ATF2/MAPK1/PPP2CA/PPP1CB/ATP2A2/CREB1/CAMK2G/CAMK2D/AKT2/GNAI3/PPP1CC/PRKCA/TPM3/ADCY6/GNAI1/GNAQ/PPP2R5E/ATP2B1/PRKACB/CREB3L2/RPS6KA5/ADCY9/PPP2R2A/AKT1/PPP2R5A/CREB3L4/CREM/GNAI2/PPP2R2D/PPP2R5B/CALM2/PRKACA/CALM1/ATP1B1/PLCB3/PPP2CB/CALM3/ATP1A1/MAPK3/RAPGEF4/TPM4/TPM1/ADCY7/PLCB1/SLC8A1/AKT3/BCL2/ATP2B2/CACNB2/ATP2B4/PIK3CG/PPP2R3A/GNAS/ADCY5/ADCY3/SCN4B/ADRA1B/PPP2R1B/C…
hsa04310	hsa04310	Wnt signaling pathway	159	0.592627	1.4715	0.0001	0.000242872	8.31e-05	8947	tags=47%, list=19%, signal=38%	SENP2/PPP3R1/EP300/CREBBP/SMAD4/MAPK8/CTNNB1/APC/RYK/LGR4/NFATC3/MAPK9/CSNK2A1/ROCK2/CAMK2G/FBXW11/DVL3/CAMK2D/CSNK1A1/SIAH1/TBL1XR1/PRKCA/PRICKLE3/RHOA/SMAD3/INVS/BTRC/CACYBP/DVL2/TCF7L2/PSEN1/LRP6/PRKACB/PPP3CB/FZD5/CUL1/NLK/DAAM1/TBL1X/CTBP1/VANGL1/PPARD/MAP3K7/PPP3CA/CSNK2A3/CTNNBIP1/SKP1/CSNK2B/CSNK2A2/PRICKLE4/RUVBL1/ZNRF3/FZD4/PRKACA/JUN/CSNK1E/AXIN1/PLCB3/DAAM2/PORCN/NFATC2/RNF43/GSK3B/PP…
hsa04350	hsa04350	TGF-beta signaling pathway	94	0.599394	1.46045	0.0001	0.000242872	8.31e-05	11506	tags=59%, list=24%, signal=44%	EP300/SP1/CREBBP/ZFYVE9/SMAD4/MAPK1/ROCK1/PPP2CA/SMAD2/BMPR1A/SMAD1/ZFYVE16/SMURF2/RHOA/SMAD3/NEO1/SMAD5/SMURF1/BMPR2/ACVR1/TGFBR2/CUL1/ACVR2A/ACVR1B/SMAD7/RBL1/E2F4/CDKN2B/TGFBR1/SKP1/INHBC/LTBP1/TGIF1/TFDP1/RPS6KB1/PPP2CB/MAPK3/RPS6KB2/FBN1/THSD4/INHBA/SMAD6/INHBB/ID2/BMP4/RGMB/TGFB2/TGIF2/TGFB3/BMP8A/NODAL/GREM1/GDF7/BMP8B/E2F5
hsa04360	hsa04360	Axon guidance	181	0.578624	1.44224	0.0001	0.000242872	8.31e-05	13297	tags=62%, list=28%, signal=45%	PPP3R1/RASA1/PIK3CA/NCK1/MAPK1/ROCK1/RAF1/RYK/PTPN11/PAK2/PIK3CB/NFATC3/ROCK2/CAMK2G/NRAS/CAMK2D/ARHGEF12/GNAI3/ABL1/SSH1/PRKCA/CDC42/RHOA/NEO1/GNAI1/KRAS/ITGB1/BMPR2/PLCG1/PIK3R1/PPP3CB/ENAH/PPP3CA/ABLIM1/PAK1/PAK4/PARD6B/PTK2/SRGAP2/GNAI2/MET/SEMA4C/PTCH1/SMO/PARD3/SEMA5A/PIK3R2/NTN4/EFNB2/SEMA3F/CFL2/NFATC2/NGEF/NRP1/MAPK3/GSK3B/PPP3CC/UNC5B/SEMA4B/ILK/DPYSL2/TRPC6/EFNA2/PLXNA1/NTN3/FZD3/PLXNA…
hsa04370	hsa04370	VEGF signaling pathway	59	0.660181	1.5779	0.0001	0.000242872	8.31e-05	9215	tags=58%, list=20%, signal=46%	MAPK14/PPP3R1/PIK3CA/MAPK1/VEGFA/MAP2K1/RAF1/PIK3CB/NRAS/AKT2/PRKCA/CDC42/KRAS/PLCG1/PIK3R1/PPP3CB/PXN/AKT1/PPP3CA/KDR/JMJD7-PLA2G4B/PTK2/SPHK2/PIK3R2/MAPKAPK2/MAPKAPK3/NFATC2/CASP9/MAPK3/PPP3CC/PIK3R3/SRC/NOS3/AKT3
hsa04371	hsa04371	Apelin signaling pathway	137	0.611116	1.51041	0.0001	0.000242872	8.31e-05	14144	tags=66%, list=30%, signal=46%	SMAD4/TFAM/MAPK1/MAP2K1/RAF1/SMAD2/NRAS/GNA13/MEF2A/AKT2/PIK3R4/GNAI3/NRF1/PRKAA1/SMAD3/PRKAG1/ADCY6/GNAI1/KRAS/GNAQ/MYLK/BORCS8-MEF2B/PRKACB/GNB1/ADCY9/BECN1/MEF2D/AKT1/ITPR2/MTOR/PRKAB2/PIK3C3/GNAI2/RRAS2/TGFBR1/SPHK2/HDAC5/CALM2/MEF2C/HDAC4/GNG12/RPS6KB1/PDE3B/PRKACA/CALM1/GABARAPL2/PLCB3/GNG10/CALM3/ITPR1/PRKAG2/PRKAB1/MAPK3/NOTCH3/APLN/JAG1/RPS6KB2/PRKAA2/MYLK4/PRKCE/ADCY7/PLCB1/MRAS/SLC8A1/…
hsa04380	hsa04380	Osteoclast differentiation	126	0.57063	1.40577	0.0001	0.000242872	8.31e-05	14333	tags=60%, list=30%, signal=42%	MAPK14/PPP3R1/TRAF6/PIK3CA/MAPK8/MAPK1/MAP2K1/PIK3CB/MAPK9/CREB1/AKT2/JAK1/TAB2/CHUK/NFKB1/TAB1/MAP2K7/TGFBR2/GRB2/PIK3R1/GAB2/PPP3CB/RELA/AKT1/STAT2/MAP3K7/PPP3CA/CYLD/IFNAR1/TGFBR1/PIK3R2/JUN/IL1R1/NFATC2/MAPK3/PPP3CC/NFKBIA/TEC/MAP3K14/IFNGR2/FOSL2/TNFRSF1A/PIK3R3/BLNK/STAT1/ITGB3/AKT3/IFNGR1/TGFB2/SIRPB1/IKBKB/PLCG2/TNFRSF11B/MITF/LCP2/TRAF2/CSF1/FCGR2A/MAP2K6/SQSTM1/FYN/NCF2/NFKB2/FCGR3A/IL1…
hsa04390	hsa04390	Hippo signaling pathway	152	0.591484	1.46663	0.0001	0.000242872	8.31e-05	12760	tags=61%, list=27%, signal=44%	DLG1/SMAD4/CTNNB1/PPP2CA/APC/TEAD1/PPP1CB/MOB1A/FBXW11/SMAD2/BMPR1A/DVL3/TEAD3/YAP1/SMAD1/LIMD1/PPP1CC/TP53BP2/SMAD3/BIRC2/LATS1/BTRC/YWHAG/DVL2/BMPR2/PRKCI/YWHAQ/TCF7L2/TGFBR2/CSNK1D/FZD5/LATS2/CTNNA1/PPP2R2A/AJUBA/LLGL1/YWHAB/WWTR1/SMAD7/MOB1B/PARD6B/SAV1/YWHAH/STK3/PATJ/TGFBR1/PPP2R2D/PARD3/NF2/FZD4/CSNK1E/AXIN1/YWHAE/PPP2CB/TP73/GSK3B/FZD6/AMOT/FZD1/FRMD6/FZD3/WNT3/RASSF1/DLG2/TCF7/DLG3/AXIN2…
hsa04510	hsa04510	Focal adhesion	199	0.564822	1.41161	0.0001	0.000242872	8.31e-05	14976	tags=64%, list=32%, signal=44%	PIK3CA/ARHGAP5/MAPK8/MAPK1/ROCK1/VEGFA/CTNNB1/MAP2K1/SOS1/RAF1/PAK2/PPP1CB/PIK3CB/SOS2/MAPK9/PPP1R12A/ROCK2/PDPK1/CRKL/ELK1/AKT2/ACTN4/PPP1CC/PRKCA/CDC42/RHOA/BIRC2/RAP1A/ITGB1/MYLK/RAP1B/RAPGEF1/TLN1/GRB2/PIK3R1/PXN/FLT1/XIAP/BRAF/PPP1R12B/ITGA6/AKT1/PDGFC/ARHGAP35/KDR/PAK1/PAK4/PTK2/VCL/MET/LAMC1/VAV2/ACTN1/DIAPH1/PIK3R2/COL4A1/PDGFB/SHC1/PTEN/PARVA/JUN/DOCK1/ITGA5/CRK/EGFR/ITGA1/MAPK3/GSK3B/BC…
hsa04520	hsa04520	Adherens junction	71	0.678742	1.63721	0.0001	0.000242872	8.31e-05	6915	tags=62%, list=15%, signal=53%	EP300/TJP1/CREBBP/SMAD4/CTNND1/WASL/MAPK1/CTNNB1/CSNK2A1/PTPN1/YES1/ACTN4/CDC42/RHOA/SMAD3/AFDN/PTPRJ/NECTIN3/TCF7L2/LMO7/TGFBR2/WASF2/NLK/ACP1/CTNNA1/PTPRF/MAP3K7/CSNK2A3/VCL/MET/SORBS1/TGFBR1/SSX2IP/PARD3/ACTN1/CSNK2B/WASF1/CSNK2A2/IQGAP1/FARP2/INSR/EGFR/MAPK3/PTPRB
hsa04530	hsa04530	Tight junction	168	0.598033	1.48749	0.0001	0.000242872	8.31e-05	8988	tags=50%, list=19%, signal=41%	TJAP1/DLG1/TJP1/MAPK8/ROCK1/ACTR2/ACTR3/PPP2CA/RDX/MAPK9/RAPGEF2/ROCK2/MYH9/ACTN4/CDC42/RAPGEF6/RHOA/PRKAA1/AFDN/RAB8A/PRKAG1/RAP1A/MAGI1/TUBA1B/ITGB1/OCLN/PRKCI/MAP2K7/MARVELD2/ARHGEF18/PCNA/AMOTL2/PRKACB/NEDD4/RAP2C/TUBA1C/MYH10/PPP2R2A/MAP3K1/WHAMM/LLGL1/TJP2/PRKAB2/PARD6B/ACTR3B/PATJ/PPP2R2D/GATA4/PARD3/ACTN1/RAB8B/STK11/NF2/CTTN/PRKACA/JUN/CLDN23/SLC9A3R1/MPDZ/CDK4/PPP2CB/PRKAG2/PRKAB1/CLDN1…
hsa04550	hsa04550	Signaling pathways regulating pluripotency of stem cells	140	0.610567	1.50985	0.0001	0.000242872	8.31e-05	11379	tags=56%, list=24%, signal=42%	MAPK14/BMI1/SMAD4/PIK3CA/MAPK1/CTNNB1/MAP2K1/APC/COMMD3-BMI1/RAF1/JARID2/REST/PIK3CB/SMAD2/BMPR1A/NRAS/DVL3/SMARCAD1/SMAD1/AKT2/JAK1/RIF1/ZFHX3/SMAD3/KAT6A/KRAS/SMAD5/PCGF6/ONECUT1/DVL2/BMPR2/ACVR1/GRB2/PIK3R1/FZD5/IL6ST/ACVR2A/SKIL/SETDB1/ACVR1B/AKT1/JAK2/PCGF3/STAT3/INHBC/MEIS1/PIK3R2/FZD4/AXIN1/MAPK3/GSK3B/PCGF5/FZD6/FZD1/TCF3/FZD3/WNT3/INHBA/PIK3R3/LIFR/TCF7/AXIN2/DVL1/INHBB/ID2/BMP4/AKT3/HES…
hsa04611	hsa04611	Platelet activation	124	0.587889	1.44762	0.0001	0.000242872	8.31e-05	14413	tags=65%, list=31%, signal=45%	MAPK14/PIK3CA/MAPK1/ROCK1/PPP1CB/PIK3CB/PPP1R12A/ROCK2/SNAP23/GNA13/ARHGEF12/AKT2/STIM1/GNAI3/PPP1CC/RHOA/ADCY6/RAP1A/GNAI1/GNAQ/ITGB1/MYLK/RAP1B/PRKCI/TLN1/PRKACB/PIK3R1/ADCY9/AKT1/ITPR2/ARHGAP35/JMJD7-PLA2G4B/GNAI2/PIK3R2/PRKACA/LYN/PLCB3/P2RY1/ITPR1/MAPK3/F2R/GUCY1B1/ITGA2/GUCY1A1/MYLK4/TLN2/PIK3R3/ADCY7/PLCB1/ITGB3/SRC/GUCY1A2/NOS3/ACTG1/AKT3/ITPR3/PLCG2/ORAI1/LCP2/PIK3CG/FCGR2A/COL3A1/GNAS/A…
hsa04620	hsa04620	Toll-like receptor signaling pathway	99	0.588533	1.43708	0.0001	0.000242872	8.31e-05	8567	tags=44%, list=18%, signal=36%	MAPK14/RIPK1/TRAF6/PIK3CA/MAPK8/MAPK1/TBK1/MAP2K1/PIK3CB/MAPK9/TIRAP/AKT2/CASP8/TAB2/CHUK/NFKB1/IRAK4/TAB1/MYD88/MAP2K7/PIK3R1/MAP2K4/RELA/AKT1/FADD/MAP3K7/TICAM1/IFNAR1/PIK3R2/IRF5/JUN/TRAF3/TLR3/TLR1/MAPK3/MAP3K8/NFKBIA/TLR4/TOLLIP/TLR6/TICAM2/PIK3R3/STAT1/TLR5
hsa04621	hsa04621	NOD-like receptor signaling pathway	173	0.566087	1.40923	0.0001	0.000242872	8.31e-05	11338	tags=48%, list=24%, signal=37%	MAPK14/RIPK1/ERBIN/TRAF6/MFN1/MAPK8/MAPK1/TBK1/NEK7/TRPM7/MAPK9/BRCC3/TAB3/MFN2/HSP90AB1/JAK1/CASP8/TAB2/CHUK/RHOA/NFKB1/BIRC2/TANK/IRAK4/TAB1/ATG16L1/MYD88/DNM1L/DHX33/RELA/XIAP/OAS3/FADD/STAT2/ITPR2/MAP3K7/ATG5/PANX1/VDAC2/MAVS/TICAM1/IFNAR1/TP53BP1/NLRX1/TNFAIP3/BCL2L1/GABARAPL2/JUN/TRAF3/VDAC1/PLCB3/MCU/RNASEL/ITPR1/ATG12/MAPK3/P2RX7/NFKBIA/TLR4/HSP90AA1/PRKCD/VDAC3/GBP1/NOD1/STAT1/PLCB1/CTSB…
hsa04622	hsa04622	RIG-I-like receptor signaling pathway	66	0.629319	1.51241	0.0001	0.000242872	8.31e-05	6688	tags=42%, list=14%, signal=36%	MAPK14/RIPK1/TRAF6/AZI2/MAPK8/TBK1/DDX3X/MAPK9/CASP8/CHUK/NFKB1/TANK/OTUD5/RELA/MAP3K1/FADD/MAP3K7/TRIM25/ATG5/IFIH1/CYLD/CASP10/MAVS/DDX58/NLRX1/TRAF3/ATG12/NFKBIA
hsa04625	hsa04625	C-type lectin receptor signaling pathway	104	0.620836	1.51877	0.0001	0.000242872	8.31e-05	9975	tags=53%, list=21%, signal=42%	MAPK14/PPP3R1/PIK3CA/MAPK8/MAPK1/RAF1/PTPN11/PIK3CB/NFATC3/MAPK9/NRAS/ARHGEF12/AKT2/CASP8/CHUK/RHOA/NFKB1/MALT1/KRAS/BCL10/PIK3R1/PPP3CB/RELA/AKT1/STAT2/ITPR2/PPP3CA/CBLB/CYLD/PAK1/RRAS2/CALM2/KSR1/PIK3R2/CALM1/JUN/MAPKAPK2/CALM3/ITPR1/NFATC2/MAPK3/PPP3CC/NFKBIA/MAP3K14/PRKCD/IRF1/PIK3R3/STAT1/MRAS/SRC/AKT3/IL23A/ITPR3/IKBKB/PLCG2
hsa04659	hsa04659	Th17 cell differentiation	105	0.589788	1.44368	0.0001	0.000242872	8.31e-05	9895	tags=46%, list=21%, signal=36%	MAPK14/RXRB/PPP3R1/SMAD4/STAT5B/MAPK8/MAPK1/NFATC3/MAPK9/SMAD2/HSP90AB1/JAK1/CHUK/NFKB1/SMAD3/PLCG1/TGFBR2/PPP3CB/IL6ST/RELA/RARA/HIF1A/PPP3CA/MTOR/JAK2/AHR/IL6R/STAT3/TGFBR1/IL1RAP/STAT6/JUN/RXRA/IL1R1/NFATC2/MAPK3/PPP3CC/NFKBIA/HSP90AA1/IFNGR2/RORC/STAT1/RUNX1/IFNGR1/IL23A/RORA/IL4R/IKBKB
hsa04660	hsa04660	T cell receptor signaling pathway	103	0.635942	1.55523	0.0001	0.000242872	8.31e-05	9895	tags=54%, list=21%, signal=43%	MAPK14/DLG1/PPP3R1/PIK3CA/NCK1/MAPK8/MAPK1/MAP2K1/SOS1/RAF1/PAK2/PIK3CB/SOS2/NFATC3/MAPK9/PDPK1/NRAS/AKT2/CHUK/CDC42/RHOA/NFKB1/MALT1/KRAS/BCL10/PLCG1/MAP2K7/GRB2/PIK3R1/PPP3CB/RELA/AKT1/MAP3K7/PPP3CA/CBLB/PAK1/PAK4/VAV2/PIK3R2/JUN/CDK4/NFATC2/MAPK3/MAP3K8/GSK3B/PPP3CC/NFKBIA/TEC/MAP3K14/PIK3R3/PTPRC/VAV3/AKT3/CD28/NCK2/IKBKB
hsa04666	hsa04666	Fc gamma R-mediated phagocytosis	92	0.604828	1.47269	0.0001	0.000242872	8.31e-05	10685	tags=57%, list=23%, signal=44%	PIK3CA/PIP5K1A/MAPK1/MAP2K1/RAF1/PIK3CB/CRKL/AKT2/ARF6/PRKCA/CDC42/ARPC5/INPPL1/PLCG1/PIK3R1/GAB2/ASAP2/WASF2/PLPP3/AKT1/DNM2/PAK1/JMJD7-PLA2G4B/ARPC4/VAV2/SPHK2/WASF1/PIK3R2/ASAP1/RPS6KB1/LYN/ARPC2/CFL2/CRK/MAPK3/PLD2/PIP5K1C/PRKCD/RPS6KB2/PRKCE/PIK3R3/PLA2G6/PTPRC/VAV3/AKT3/PLD1/LIMK1/CFL1/PLCG2/SCIN/MYO10/FCGR2A
hsa04668	hsa04668	TNF signaling pathway	112	0.609707	1.49619	0.0001	0.000242872	8.31e-05	10914	tags=57%, list=23%, signal=44%	ATF6B/MAPK14/RIPK1/PIK3CA/ITCH/ATF2/MAPK8/MAPK1/MAP2K1/PIK3CB/MAPK9/CREB1/TAB3/AKT2/BAG4/CASP8/TAB2/CHUK/NFKB1/BIRC2/TAB1/DNM1L/MAP2K7/CASP3/PIK3R1/CREB3L2/MAP2K4/CASP7/RPS6KA5/RELA/CFLAR/AKT1/FADD/MAP3K7/CREB3L4/CASP10/PGAM5/PIK3R2/TNFAIP3/JUN/DAB2IP/TRAF3/MAPK3/MAP3K8/RPS6KA4/NFKBIA/MAP3K14/JAG1/TRAF1/FAS/IRF1/MMP14/TNFRSF1A/PIK3R3/EDN1/AKT3/MAP3K5/NOD2/IKBKB/CX3CL1/TRAF5/TRAF2/CSF1/MAP2K6
hsa04720	hsa04720	Long-term potentiation	67	0.627388	1.50889	0.0001	0.000242872	8.31e-05	6636	tags=45%, list=14%, signal=39%	PPP3R1/EP300/CREBBP/MAPK1/MAP2K1/RAF1/PPP1CB/CAMK2G/NRAS/CAMK2D/PPP1CC/PRKCA/RPS6KA3/RAP1A/KRAS/GNAQ/RAP1B/PRKACB/PPP3CB/BRAF/ITPR2/PPP3CA/CALM2/PRKACA/CALM1/PLCB3/CALM3/ITPR1/MAPK3/PPP3CC
hsa04722	hsa04722	Neurotrophin signaling pathway	119	0.67457	1.65923	0.0001	0.000242872	8.31e-05	6688	tags=54%, list=14%, signal=46%	MAPK14/FRS2/TRAF6/PIK3CA/ZNF274/MAPK8/MAPK1/MAP2K1/SOS1/KIDINS220/RAF1/PTPN11/GAB1/PIK3CB/SOS2/MAPK9/CAMK2G/PDPK1/NRAS/CRKL/MAP3K3/CAMK2D/AKT2/PRDM4/ABL1/CDC42/RPS6KA3/RHOA/NFKB1/IRAK4/RAP1A/KRAS/RAP1B/RAPGEF1/PSEN1/PLCG1/MAP2K7/GRB2/PIK3R1/RPS6KA5/RELA/SH2B1/SH2B3/BRAF/MAP3K1/AKT1/FOXO3/IRAK2/CALM2/MAPK7/PIK3R2/IRS1/SHC1/CALM1/JUN/MAPKAPK2/YWHAE/MAP2K5/CALM3/CRK/TP73/MAPK3/GSK3B/NFKBIA
hsa04728	hsa04728	Dopaminergic synapse	131	0.587717	1.45016	0.0001	0.000242872	8.31e-05	14461	tags=60%, list=31%, signal=41%	PPP2R5D/ATF6B/MAPK14/ATF2/MAPK8/PPP2CA/PPP1CB/MAPK9/CREB1/CAMK2G/CAMK2D/CLOCK/AKT2/GNAI3/KIF5B/PPP1CC/PRKCA/GNAI1/GNAQ/PPP2R5E/PRKACB/PPP3CB/CREB3L2/GNB1/PPP2R2A/AKT1/ITPR2/PPP3CA/ARNTL/PPP2R5A/CREB3L4/GNAI2/LRTOMT/PPP2R2D/PPP2R5B/CALM2/GSK3A/GNG12/PRKACA/CALM1/PLCB3/PPP2CB/GNG10/CALM3/ITPR1/GSK3B/PPP3CC/MAOA/MAOB/PLCB1/GNB5/GNB2/AKT3/ITPR3/GNG2/GNB4/PPP2R3A/GNAS/ADCY5/GNG7/PPP2R1B/CACNA1C/PPP1CA…
hsa04810	hsa04810	Regulation of actin cytoskeleton	213	0.596037	1.49248	0.0001	0.000242872	8.31e-05	10643	tags=52%, list=23%, signal=40%	PIK3CA/PIP5K1A/WASL/MAPK1/ROCK1/NCKAP1/MAP2K1/APC/SOS1/RAF1/RDX/PIKFYVE/PAK2/PPP1CB/PIK3CB/SOS2/PPP1R12A/ROCK2/NRAS/SPATA13/CRKL/MYH9/GNA13/ARHGEF12/PIP4K2C/ACTN4/PIP4K2B/PPP1CC/CYFIP1/SSH1/CDC42/RHOA/KRAS/ARPC5/ITGB1/MYLK/PIK3R1/PXN/ARHGEF7/WASF2/MYH10/DIAPH2/BRAF/PPP1R12B/ENAH/ITGA6/PDGFC/ARHGAP35/IQGAP2/PAK1/PAK4/ARPC4/PTK2/VCL/GNA12/VAV2/RRAS2/ACTN1/DIAPH1/WASF1/PIK3R2/GNG12/PDGFB/IQGAP1/DOCK…
hsa04910	hsa04910	Insulin signaling pathway	136	0.632724	1.56341	0.0001	0.000242872	8.31e-05	10004	tags=57%, list=21%, signal=45%	PIK3CA/MAPK8/EIF4E/MAPK1/MAP2K1/PRKAR2A/SOS1/RAF1/PPP1CB/PIK3CB/SOS2/MAPK9/PDPK1/PTPN1/NRAS/CRKL/ELK1/PRKAR1A/AKT2/PPP1CC/RPTOR/PRKAA1/PRKAG1/KRAS/RAPGEF1/PRKCI/INPPL1/RHEB/PRKACB/GRB2/PIK3R1/SOCS4/PTPRF/BRAF/TSC1/AKT1/CBLB/MTOR/MKNK1/CBL/PRKAB2/PHKB/SORBS1/EXOC7/CALM2/PIK3R2/IRS1/SHC1/RPS6KB1/PDE3B/PRKACA/ACACA/CALM1/FLOT1/CALM3/INSR/PRKAG2/CRK/PRKAB1/MAPK3/GSK3B/TSC2/RPS6KB2/PPP1R3B/PPP1R3D/PRK…
hsa04912	hsa04912	GnRH signaling pathway	93	0.619695	1.50931	0.0001	0.000242872	8.31e-05	10914	tags=56%, list=23%, signal=43%	MAPK14/MAP3K2/MAPK8/MAPK1/MAP2K1/SOS1/RAF1/SOS2/MAPK9/CAMK2G/NRAS/MAP3K3/CAMK2D/ELK1/PRKCA/CDC42/GNA11/ADCY6/KRAS/GNAQ/MAP2K7/PRKACB/GRB2/MAP2K4/ADCY9/MAP3K1/ITPR2/JMJD7-PLA2G4B/CALM2/MAPK7/PRKACA/CALM1/JUN/PLCB3/CALM3/ITPR1/EGFR/MAPK3/PTK2B/PLD2/MAP3K4/PRKCD/MMP14/ADCY7/PLCB1/SRC/ITPR3/PLD1/HBEGF/GNAS/ADCY5/MAP2K6
hsa04914	hsa04914	Progesterone-mediated oocyte maturation	99	0.666158	1.62663	0.0001	0.000242872	8.31e-05	10119	tags=64%, list=22%, signal=50%	MAPK14/PIK3CA/CDC23/MAPK8/MAPK1/CDC27/MAP2K1/CDK2/RAF1/PIK3CB/MAPK9/AKT2/FZR1/HSP90AB1/GNAI3/RPS6KA3/ANAPC10/CPEB2/ADCY6/GNAI1/KRAS/CPEB4/SPDYE16/PRKACB/PIK3R1/ANAPC13/SPDYE3/ADCY9/BRAF/AKT1/ANAPC1/ANAPC4/GNAI2/BUB1/ANAPC2/SPDYE2/MAD2L1/PIK3R2/SPDYE1/PDE3B/PRKACA/SPDYE6/SPDYE5/CDK1/ANAPC7/CCNA2/CDC16/MAPK3/AURKA/ANAPC5/PLK1/HSP90AA1/CPEB3/CCNB2/PIK3R3/ADCY7/CCNB3/SPDYE2B/AKT3/CDC25C/CDC25A/CCNB1/…
hsa04915	hsa04915	Estrogen signaling pathway	137	0.583007	1.44093	0.0001	0.000242872	8.31e-05	9453	tags=43%, list=20%, signal=35%	ATF6B/SP1/PIK3CA/ATF2/MAPK1/MAP2K1/SOS1/RAF1/PIK3CB/SOS2/CREB1/NRAS/NCOA1/HSPA1L/NCOA2/AKT2/HSP90AB1/GNAI3/ADCY6/GNAI1/KRAS/GNAQ/NCOA3/PRKACB/GRB2/PIK3R1/CREB3L2/ADCY9/RARA/AKT1/ITPR2/CREB3L4/GNAI2/CALM2/PIK3R2/SHC1/PRKACA/CALM1/JUN/PLCB3/EBAG9/CALM3/ITPR1/EGFR/MAPK3/HSPA1B/HSPA1A/HSP90AA1/HSPA8/PRKCD/FKBP5/PIK3R3/ADCY7/PLCB1/SRC/NOS3/AKT3/BCL2/ITPR3
hsa04916	hsa04916	Melanogenesis	101	0.606934	1.48306	0.0001	0.000242872	8.31e-05	10828	tags=51%, list=23%, signal=40%	EP300/CREBBP/MAPK1/CTNNB1/MAP2K1/RAF1/CREB1/CAMK2G/NRAS/DVL3/CAMK2D/GNAI3/PRKCA/ADCY6/GNAI1/KRAS/GNAQ/DVL2/TCF7L2/PRKACB/FZD5/CREB3L2/ADCY9/KITLG/CREB3L4/GNAI2/CALM2/EDNRB/FZD4/PRKACA/CALM1/PLCB3/CALM3/MAPK3/GSK3B/FZD6/FZD1/FZD3/WNT3/ADCY7/PLCB1/TCF7/DVL1/EDN1/TCF7L1/KIT/MITF/GNAS/WNT5A/FZD8/ADCY5/MC1R
hsa04917	hsa04917	Prolactin signaling pathway	70	0.635226	1.53126	0.0001	0.000242872	8.31e-05	9215	tags=51%, list=20%, signal=41%	MAPK14/PIK3CA/STAT5B/MAPK8/MAPK1/SOCS5/MAP2K1/SOS1/RAF1/PIK3CB/SOS2/MAPK9/SOCS6/NRAS/AKT2/NFKB1/KRAS/SOCS7/GRB2/PIK3R1/SOCS4/RELA/AKT1/FOXO3/JAK2/PRLR/STAT3/PIK3R2/SHC1/MAPK3/GSK3B/IRF1/PIK3R3/STAT1/SRC/AKT3
hsa04919	hsa04919	Thyroid hormone signaling pathway	119	0.648946	1.5962	0.0001	0.000242872	8.31e-05	9225	tags=59%, list=20%, signal=47%	RXRB/SIN3A/EP300/CREBBP/PIK3CA/MED13/MAPK1/MED14/CTNNB1/MED17/MAP2K1/MED12/RAF1/MED13L/MED1/PIK3CB/ATP2A2/PDPK1/NRAS/NCOA1/NCOA2/AKT2/PRKCA/KRAS/PLCG1/NOTCH2/KAT2B/RHEB/NCOA3/PRKACB/PIK3R1/THRA/THRB/HIF1A/AKT1/MTOR/HDAC2/NCOR1/NOTCH1/HDAC1/GATA4/PIK3R2/MED4/TBC1D4/PRKACA/ATP1B1/PLCB3/RXRA/PFKFB2/ATP1A1/CASP9/MAPK3/NOTCH3/GSK3B/PLCD3/ITGAV/TSC2/MED24/FOXO1/PLCE1/PIK3R3/STAT1/PLCB1/ITGB3/SRC/ACTG1/…
hsa04920	hsa04920	Adipocytokine signaling pathway	68	0.606186	1.459	0.0001	0.000242872	8.31e-05	11050	tags=56%, list=23%, signal=43%	RXRB/MAPK8/PTPN11/MAPK9/AKT2/ADIPOR1/CHUK/NFKB1/PRKAA1/PRKAG1/CAMKK2/RELA/AKT1/ADIPOR2/MTOR/JAK2/PPARA/PRKAB2/STAT3/STK11/IRS1/RXRA/PRKAG2/PRKAB1/CPT1A/NFKBIA/PRKAA2/IRS2/CD36/TNFRSF1A/AKT3/ACACB/IKBKB/SLC2A1/CPT1B/TRAF2/ACSL3/ACSL5
hsa04921	hsa04921	Oxytocin signaling pathway	153	0.556041	1.37895	0.0001	0.000242872	8.31e-05	13820	tags=55%, list=29%, signal=39%	PPP3R1/MAPK1/ROCK1/MAP2K1/RAF1/PPP1CB/NFATC3/PPP1R12A/ROCK2/CAMK2G/NRAS/CAMK2D/ELK1/EEF2K/GNAI3/PPP1CC/PRKCA/RHOA/PRKAA1/PRKAG1/ADCY6/GNAI1/KRAS/GNAQ/MYLK/PRKACB/PPP3CB/CAMKK2/ADCY9/PPP1R12B/ITPR2/PPP3CA/PRKAB2/JMJD7-PLA2G4B/GNAI2/CALM2/MAPK7/MEF2C/PRKACA/CALM1/JUN/PLCB3/MAP2K5/CALM3/ITPR1/PRKAG2/NFATC2/EGFR/PRKAB1/MAPK3/KCNJ2/PPP3CC/GUCY1B1/PRKAA2/GUCY1A1/MYLK4/CAMK1D/ADCY7/PLCB1/SRC/GUCY1A2/NOS…
hsa04922	hsa04922	Glucagon signaling pathway	104	0.621553	1.52052	0.0001	0.000242872	8.31e-05	12784	tags=62%, list=27%, signal=46%	SIRT1/PPP4R3B/PPP3R1/EP300/CREBBP/ATF2/PPP4R3A/CREB1/CAMK2G/CAMK2D/AKT2/PRKAA1/PRKAG1/GNAQ/PRKACB/PPP3CB/CREB3L2/SIK2/AKT1/ITPR2/PPP3CA/PPARA/CREB3L4/PRKAB2/PHKB/CALM2/PGAM1/PDE3B/PRKACA/ACACA/PDHB/CALM1/LDHA/PLCB3/CALM3/ITPR1/PRKAG2/PRKAB1/CRTC2/CPT1A/PPP3CC/PFKM/PRKAA2/FOXO1/GYS1/PLCB1/AKT3/ACACB/ITPR3/PDHA1/PFKL/PYGB/SLC2A1/CPT1B/PYGL/GNAS/SLC2A2/PHKA2/PGAM4/PHKG2/PHKA1/LDHAL6B/SIK1/PPP4C/CREB3
hsa04926	hsa04926	Relaxin signaling pathway	129	0.595346	1.46778	0.0001	0.000242872	8.31e-05	14413	tags=63%, list=31%, signal=44%	ATF6B/MAPK14/PIK3CA/ATF2/MAPK8/MAPK1/VEGFA/MAP2K1/SOS1/RAF1/PIK3CB/SOS2/MAPK9/CREB1/SMAD2/NRAS/AKT2/GNAI3/PRKCA/NFKB1/ADCY6/GNAI1/KRAS/MAP2K7/TGFBR2/PRKACB/GRB2/PIK3R1/CREB3L2/GNB1/MAP2K4/RELA/ADCY9/AKT1/CREB3L4/GNAI2/TGFBR1/EDNRB/PIK3R2/GNG12/COL4A1/SHC1/PRKACA/JUN/PLCB3/GNG10/EGFR/MAPK3/NFKBIA/COL4A2/PIK3R3/ADCY7/PLCB1/GNB5/SRC/NOS3/GNB2/EDN1/AKT3/GNG2/GNB4/COL3A1/GNAS/ADCY5/RXFP1/ADCY3/COL4A4/…
hsa04931	hsa04931	Insulin resistance	107	0.615464	1.50744	0.0001	0.000242872	8.31e-05	10336	tags=60%, list=22%, signal=47%	PIK3CA/MAPK8/PTPN11/PPP1CB/PIK3CB/MAPK9/CREB1/PDPK1/PTPN1/AKT2/PPP1CC/RPS6KA3/NFKB1/PRKAA1/PRKAG1/OGA/OGT/MLX/PIK3R1/CREB3L2/RELA/PTPRF/AKT1/MTOR/PPARA/CREB3L4/GFPT1/PRKAB2/STAT3/PIK3R2/IRS1/TBC1D4/PTEN/RPS6KB1/INSR/PRKAG2/PRKAB1/CRTC2/CPT1A/GSK3B/NFKBIA/PRKCD/RPS6KB2/PPP1R3B/PPP1R3D/PRKAA2/IRS2/CD36/MLXIP/PRKCE/FOXO1/GYS1/NR1H2/TNFRSF1A/PIK3R3/NOS3/AKT3/ACACB/IKBKB/PYGB/RPS6KA1/SLC2A1/CPT1B/PYGL
hsa04933	hsa04933	AGE-RAGE signaling pathway in diabetic complications	100	0.579062	1.41433	0.0001	0.000242872	8.31e-05	14816	tags=69%, list=31%, signal=47%	MAPK14/SMAD4/PIK3CA/STAT5B/MAPK8/MAPK1/VEGFA/CDKN1B/PIK3CB/MAPK9/SMAD2/NRAS/AKT2/PRKCA/CDC42/NFKB1/SMAD3/KRAS/PLCG1/TGFBR2/CASP3/PIK3R1/RELA/AKT1/JAK2/STAT3/PIM1/TGFBR1/DIAPH1/PIK3R2/COL4A1/JUN/PLCB3/CDK4/MAPK3/PLCD3/PRKCD/COL4A2/PRKCE/FOXO1/PLCE1/PIK3R3/STAT1/PLCB1/NOS3/EDN1/AKT3/BCL2/TGFB2/PLCG2/FN1/TGFB3/COL3A1/COL4A4/STAT5A/THBD/IL1B/MAPK13/COL4A5/VEGFC/CYBB/PLCB4/PRKCB/COL1A2/AGTR1/MAPK10/CO…
hsa04934	hsa04934	Cushing syndrome	155	0.592446	1.46963	0.0001	0.000242872	8.31e-05	10813	tags=51%, list=23%, signal=39%	ATF6B/USP8/SP1/KMT2D/ATF2/MAPK1/CTNNB1/ARNT/MAP2K1/RBBP5/APC/CDK2/CDKN1B/KMT2A/CREB1/CAMK2G/DVL3/CAMK2D/WDR5B/GNAI3/GNA11/ADCY6/RAP1A/GNAI1/GNAQ/RAP1B/DVL2/TCF7L2/PDE8A/ASH2L/PRKACB/FZD5/CREB3L2/ADCY9/CCNE2/BRAF/E2F3/ITPR2/MEN1/RB1/CREB3L4/AHR/GNAI2/CDKN2B/FZD4/PRKACA/CDKN2C/AXIN1/PLCB3/WDR5/CDK4/ITPR1/EGFR/MAPK3/GSK3B/NCEH1/FZD6/FZD1/FZD3/E2F2/WNT3/ADCY7/PLCB1/CDK6/TCF7/AXIN2/DVL1/ITPR3/LDLR/PDE…
hsa05034	hsa05034	Alcoholism	102	0.583775	1.42699	0.0001	0.000242872	8.31e-05	13774	tags=58%, list=29%, signal=41%	ATF6B/ATF2/MAPK1/MAP2K1/SOS1/RAF1/PPP1CB/SOS2/CREB1/NRAS/SLC29A1/GNAI3/HAT1/PPP1CC/GNAI1/KRAS/GRB2/CREB3L2/GNB1/CAMKK2/BRAF/CREB3L4/HDAC2/GNAI2/HDAC1/HDAC5/CALM2/HDAC4/GNG12/SHC1/PRKACA/CALM1/GNG10/CALM3/MAPK3/HDAC8/ADORA2A/MAOA/MAOB/HDAC10/GNB5/GNB2/ADORA2B/GRIN2C/GNG2/HDAC9/GNB4/GNAS/ADCY5/HDAC3/GNG7/PPP1CA/DRD1/CREB3/GNG5/HDAC11/GNG3/CAMK4/CALML4
hsa05100	hsa05100	Bacterial invasion of epithelial cells	73	0.659082	1.59095	0.0001	0.000242872	8.31e-05	8982	tags=59%, list=19%, signal=48%	CD2AP/PIK3CA/WASL/CTNNB1/GAB1/PIK3CB/CRKL/SEPTIN8/CDC42/CLTC/RHOA/ARPC5/ITGB1/ELMO2/SEPTIN2/PIK3R1/PXN/WASF2/CTNNA1/DNM2/CBL/ARPC4/PTK2/VCL/SEPTIN11/MET/WASF1/PIK3R2/SHC1/CTTN/SEPTIN9/DOCK1/ARPC2/ITGA5/CRK/ELMO1/BCAR1/ILK/CAV1/PIK3R3/CAV2/SRC/ACTG1
hsa05120	hsa05120	Epithelial cell signaling in Helicobacter pylori infection	70	0.654609	1.57799	0.0001	0.000242872	8.31e-05	10364	tags=59%, list=22%, signal=46%	MAPK14/TJP1/ATP6V1A/MAPK8/ADAM10/PTPN11/MAPK9/CHUK/CDC42/ADAM17/NFKB1/PLCG1/ATP6V0A2/CASP3/MAP2K4/RELA/CSK/PAK1/MET/ATP6V1D/ATP6V1B2/ATP6V1C1/JUN/LYN/GIT1/EGFR/ATP6AP1/NFKBIA/ATP6V1G2/MAP3K14/ATP6V1E2/ATP6V1E1/ATP6V1G1/F11R/NOD1/SRC/JAM3/IKBKB/PLCG2/ATP6V0D1/HBEGF
hsa05131	hsa05131	Shigellosis	66	0.687727	1.65278	0.0001	0.000242872	8.31e-05	9895	tags=64%, list=21%, signal=50%	MAPK14/WASL/MAPK8/MAPK1/ROCK1/MAPK9/ROCK2/FBXW11/CRKL/CHUK/ABL1/CDC42/NFKB1/BTRC/UBE2D3/ARPC5/ITGB1/ELMO2/WASF2/RELA/ATG5/ARPC4/VCL/DIAPH1/WASF1/UBE2D2/CTTN/DOCK1/ARPC2/UBE2D1/ITGA5/CRK/MAPK3/ELMO1/NFKBIA/U2AF1/UBE2D4/NOD1/SRC/ACTG1/NOD2/IKBKB
hsa05135	hsa05135	Yersinia infection	121	0.655694	1.61367	0.0001	0.000242872	8.31e-05	11027	tags=65%, list=23%, signal=50%	MAPK14/TRAF6/PIK3CA/PIP5K1A/WIPF2/WASL/MAPK8/MAPK1/TBK1/ROCK1/ACTR2/ACTR3/PKN2/MAP2K1/PIK3CB/NFATC3/MAPK9/ROCK2/CRKL/GIT2/ARHGEF12/AKT2/ARF6/TAB2/CHUK/CDC42/RPS6KA3/RHOA/NFKB1/IRAK4/TAB1/ITGB1/MYD88/PLCG1/MAP2K7/PIK3R1/PXN/ARHGEF7/MAP2K4/WASF2/RELA/AKT1/MAP3K7/PTK2/TICAM1/ACTR3B/VAV2/SKAP2/PIK3R2/JUN/DOCK1/ITGA5/CRK/NFATC2/MAPK3/GSK3B/BCAR1/NFKBIA/PTK2B/TLR4/ITGA4/PIP5K1C/ARHGEF28/PIK3R3/VAV3/SRC…
hsa05142	hsa05142	Chagas disease (American trypanosomiasis)	101	0.577177	1.41035	0.0001	0.000242872	8.31e-05	9895	tags=49%, list=21%, signal=38%	MAPK14/TRAF6/PIK3CA/MAPK8/MAPK1/PPP2CA/PIK3CB/MAPK9/SMAD2/AKT2/CASP8/GNAI3/CHUK/GNA11/NFKB1/IRAK4/GNAI1/GNAQ/MYD88/TGFBR2/PIK3R1/MAP2K4/RELA/PPP2R2A/CFLAR/AKT1/FADD/GNAI2/TICAM1/TGFBR1/PPP2R2D/PIK3R2/JUN/PLCB3/PPP2CB/MAPK3/NFKBIA/TLR4/TLR6/IFNGR2/FAS/TNFRSF1A/PIK3R3/ACE/PLCB1/AKT3/IFNGR1/TGFB2/IKBKB
hsa05145	hsa05145	Toxoplasmosis	111	0.565547	1.38729	0.0001	0.000242872	8.31e-05	14647	tags=63%, list=31%, signal=44%	MAPK14/TRAF6/MAPK8/MAPK1/MAPK9/PDPK1/HSPA1L/AKT2/JAK1/CASP8/TAB2/GNAI3/CHUK/NFKB1/BIRC2/IRAK4/GNAI1/TAB1/ITGB1/MYD88/CASP3/RELA/XIAP/ITGA6/AKT1/MAP3K7/JAK2/GNAI2/LAMC1/STAT3/IL10RB/BCL2L1/CASP9/MAPK3/HSPA1B/NFKBIA/TLR4/HSPA1A/HSPA8/CYCS/IFNGR2/TNFRSF1A/STAT1/AKT3/IFNGR1/BCL2/TGFB2/LDLR/IKBKB/TGFB3/PIK3CG/MAP2K6/TLR2/CD40/HSPA2/LAMA3/PPIF/LAMB3/IL12A/MAPK13/LAMA2/NOS2/LAMA4/ALOX5/PIK3R5/HLA-DRA/MA…
hsa05152	hsa05152	Tuberculosis	173	0.561974	1.39899	0.0001	0.000242872	8.31e-05	11060	tags=46%, list=24%, signal=36%	MAPK14/NFYA/PPP3R1/TRAF6/EP300/CREBBP/RAB5A/MAPK8/MAPK1/RAB5B/APAF1/RAF1/EEA1/RAB7A/RAB5C/MAPK9/CREB1/TIRAP/CAMK2G/CAMK2D/ARHGEF12/AKT2/JAK1/CASP8/NFYC/RHOA/NFKB1/IRAK4/MALT1/MYD88/BCL10/RFX5/ATP6V0A2/CASP3/PPP3CB/RELA/AKT1/FADD/PPP3CA/NFYB/JAK2/IRAK2/CASP10/LAMP2/RFXAP/PIK3C3/CEBPG/SPHK2/CALM2/KSR1/IL10RB/LAMP1/CALM1/TLR1/CALM3/CASP9/MAPK3/PPP3CC/ATP6AP1/TLR4/TLR6/CYCS/IFNGR2/TNFRSF1A/CTSS/STAT1…
hsa05160	hsa05160	Hepatitis C	152	0.618788	1.53433	0.0001	0.000242872	8.31e-05	10114	tags=56%, list=22%, signal=44%	RIPK1/TRAF6/PIK3CA/MAPK1/TBK1/CTNNB1/APAF1/PPP2CA/MAP2K1/CDK2/SOS1/RAF1/EIF2AK3/PIK3CB/SOS2/PSME3/EIF2AK2/NRAS/AKT2/JAK1/CASP8/CHUK/NFKB1/EIF2AK1/EIF2S1/YWHAG/KRAS/OCLN/YWHAQ/CASP3/GRB2/PIK3R1/RELA/PPP2R2A/BRAF/E2F3/OAS3/CFLAR/AKT1/PIAS1/FADD/STAT2/YWHAB/RB1/PPARA/YWHAH/MAVS/TICAM1/STAT3/IFNAR1/DDX58/PPP2R2D/PIK3R2/CLDN23/TRAF3/TLR3/YWHAE/CDK4/RXRA/PPP2CB/RNASEL/EGFR/CASP9/CLDN1/MAPK3/GSK3B/NFKBI…
hsa05161	hsa05161	Hepatitis B	159	0.656787	1.63081	0.0001	0.000242872	8.31e-05	10252	tags=62%, list=22%, signal=48%	ATF6B/MAPK14/TRAF6/EP300/CREBBP/SMAD4/PIK3CA/ATF2/STAT5B/MAPK8/MAPK1/TBK1/APAF1/MAP2K1/CDK2/SOS1/RAF1/DDX3X/PIK3CB/SOS2/NFATC3/MAPK9/CREB1/TIRAP/NRAS/ELK1/AKT2/JAK1/CASP8/TAB2/CHUK/PRKCA/NFKB1/SMAD3/IRAK4/KRAS/TAB1/MYD88/YWHAQ/MAP2K7/TGFBR2/PCNA/CASP3/GRB2/PIK3R1/CREB3L2/MAP2K4/RELA/CCNE2/BRAF/E2F3/MAP3K1/AKT1/FADD/STAT2/MAP3K7/YWHAB/JAK2/IFIH1/RB1/CREB3L4/CASP10/MAVS/TICAM1/STAT3/IFNAR1/TGFBR1/D…
hsa05162	hsa05162	Measles	135	0.627027	1.54877	0.0001	0.000242872	8.31e-05	9291	tags=53%, list=20%, signal=43%	TRAF6/PIK3CA/STAT5B/MAPK8/TBK1/APAF1/CDK2/EIF2AK3/CDKN1B/PIK3CB/MAPK9/EIF2AK2/CSNK2A1/ADAR/HSPA1L/AKT2/CD46/JAK1/CASP8/TAB2/CHUK/NFKB1/RCHY1/EIF2AK1/IRAK4/EIF2S1/MYD88/CASP3/PIK3R1/RELA/CCNE2/OAS3/AKT1/FADD/STAT2/MAP3K7/CBLB/CSNK2A3/IFIH1/RAB9A/MAVS/STAT3/IFNAR1/DDX58/CSNK2B/CSNK2A2/PIK3R2/TNFAIP3/BCL2L1/JUN/TRAF3/CDK4/TP73/CASP9/HSPA1B/GSK3B/NFKBIA/TLR4/HSPA1A/MSN/HSPA8/CYCS/BAK1/FAS/PIK3R3/EIF3…
hsa05163	hsa05163	Human cytomegalovirus infection	219	0.617034	1.546	0.0001	0.000242872	8.31e-05	10914	tags=55%, list=23%, signal=43%	ATF6B/MAPK14/RIPK1/PPP3R1/SP1/PIK3CA/ATF2/MAPK1/TBK1/ROCK1/VEGFA/CTNNB1/MAP2K1/SOS1/RAF1/PIK3CB/SOS2/NFATC3/CREB1/ROCK2/NRAS/CRKL/GNA13/ELK1/ARHGEF12/ARHGEF11/AKT2/JAK1/CASP8/GNAI3/CHUK/PRKCA/GNA11/RHOA/NFKB1/ADCY6/GNAI1/KRAS/GNAQ/RHEB/PRKACB/CASP3/GRB2/PIK3R1/PPP3CB/PXN/CREB3L2/GNB1/RELA/ADCY9/E2F3/TSC1/AKT1/FADD/ITPR2/PPP3CA/MTOR/RB1/CREB3L4/PTK2/GNAI2/GNA12/IL6R/STAT3/CALM2/PIK3R2/IL10RB/GNG12…
hsa05164	hsa05164	Influenza A	165	0.588599	1.46305	0.0001	0.000242872	8.31e-05	9231	tags=47%, list=20%, signal=38%	CALCOCO2/EP300/CREBBP/PIK3CA/XPO1/MAPK1/TBK1/NUP98/APAF1/MAP2K1/RAF1/PIK3CB/EIF2AK2/ADAR/KPNA6/KPNA1/AKT2/JAK1/CASP8/CHUK/PRKCA/HNRNPUL1/NFKB1/IRAK4/RAE1/EIF2S1/MYD88/DNAJC3/CASP3/PIK3R1/RELA/NXT2/OAS3/AKT1/FADD/STAT2/RAB11A/TRIM25/JAK2/IFIH1/MAVS/TICAM1/IFNAR1/BCL2L2-PABPN1/DDX58/NLRX1/PIK3R2/SLC25A5/TNFRSF10B/TRAF3/TLR3/VDAC1/CDK4/RNASEL/CASP9/MAPK3/NFKBIA/TNFSF10/TLR4/RAB11B/CYCS/IFNGR2/TNFRSF…
hsa05165	hsa05165	Human papillomavirus infection	326	0.576274	1.4571	0.0001	0.000242872	8.31e-05	14493	tags=61%, list=31%, signal=43%	PPP2R5D/DLG1/UBE3A/EP300/CREBBP/PIK3CA/ATP6V1A/MAPK1/TBK1/VEGFA/CTNNB1/PPP2CA/MAP2K1/APC/CDK2/SOS1/RAF1/MAML1/CDKN1B/PIK3CB/SOS2/RBL2/EIF2AK2/CREB1/NRAS/DVL3/ATM/AKT2/CSNK1A1/JAK1/CASP8/CHUK/CDC42/NFX1/NFKB1/MAGI1/KRAS/ITGB1/DVL2/PPP2R5E/PRKCI/TCF7L2/PSEN1/NOTCH2/ATP6V0A2/RHEB/PRKACB/CASP3/GRB2/PIK3R1/FZD5/PXN/CREB3L2/RELA/CCNE2/PPP2R2A/TSC1/ITGA6/AKT1/FADD/STAT2/LLGL1/MTOR/RB1/PPP2R5A/CREB3L4/RB…
hsa05166	hsa05166	Human T-cell leukemia virus 1 infection	217	0.609848	1.52771	0.0001	0.000242872	8.31e-05	10221	tags=55%, list=22%, signal=43%	ATF6B/DLG1/PPP3R1/EP300/CREBBP/SMAD4/PIK3CA/XPO1/CDC23/ATF2/STAT5B/MAPK8/MAPK1/CDC27/MAP2K1/CDK2/PIK3CB/NFATC3/MAPK9/CREB1/SMAD2/TRRAP/NRAS/MAP3K3/ATM/ELK1/AKT2/JAK1/SRF/CHUK/ELK4/CANX/ANAPC10/NFKB1/SMAD3/ADCY6/BUB3/KRAS/TLN1/KAT2B/TGFBR2/PRKACB/PIK3R1/PPP3CB/CREB3L2/MAP2K4/RELA/ADCY9/CCNE2/XIAP/E2F3/MAP3K1/RANBP3/AKT1/ANAPC1/PPP3CA/NFYB/ANAPC4/RB1/CREB3L4/CRTC3/ESPL1/VDAC2/CDKN2B/ANAPC2/TGFBR1/M…
hsa05167	hsa05167	Kaposi sarcoma-associated herpesvirus infection	183	0.602112	1.5014	0.0001	0.000242872	8.31e-05	10114	tags=54%, list=22%, signal=42%	MAPK14/PPP3R1/EP300/CREBBP/PIK3CA/MAPK8/MAPK1/TBK1/VEGFA/CTNNB1/MAP2K1/RAF1/PIK3CB/NFATC3/MAPK9/EIF2AK2/CREB1/NRAS/AKT2/JAK1/CASP8/CHUK/ATG3/NFKB1/KRAS/ATG14/PLCG1/MAP2K7/CASP3/PIK3R1/PPP3CB/GNB1/MAP2K4/IL6ST/RELA/E2F3/HIF1A/BECN1/AKT1/FADD/STAT2/ITPR2/PPP3CA/MTOR/JAK2/RB1/PIK3C3/TICAM1/STAT3/IFNAR1/CALM2/MICB/PIK3R2/GNG12/PDGFB/CALM1/GABARAPL2/JUN/LYN/ANGPT2/TRAF3/TLR3/MAPKAPK2/CDK4/GNG10/CALM3/…
hsa05168	hsa05168	Herpes simplex virus 1 infection	485	0.693486	1.76547	0.0001	0.000242872	8.31e-05	10553	tags=74%, list=22%, signal=58%	ZNF184/SRSF3/ZNF627/SRPK1/ZNF200/TRAF6/ZNF41/ZNF619/PIK3CA/TBK1/DAXX/ZNF17/APAF1/ZNF616/ZNF181/SRSF4/ZSCAN32/EIF2AK3/PTPN11/ZNF689/ZNF561/ZNF2/ZNF440/RBAK/PPP1CB/ZNF136/PIK3CB/ZNF45/ZNF548/EIF2AK2/SRSF1/ZNF674/ZNF180/ZNF527/ZNF765/ZNF429/ZNF543/ZNF799/ZNF398/ZNF268/ZNF718/AKT2/ZNF461/ZNF302/JAK1/CASP8/ZNF182/ZNF791/TAB2/CHUK/EIF2B1/ZNF510/ZNF33B/ZNF585B/PPP1CC/ZNF26/ZNF641/ZNF304/ZNF823/ZNF383/ZN…
hsa05169	hsa05169	Epstein-Barr virus infection	195	0.585756	1.46331	0.0001	0.000242872	8.31e-05	12446	tags=55%, list=26%, signal=41%	MAPK14/RIPK1/SIN3A/USP7/TRAF6/PIK3CA/MAPK8/TBK1/APAF1/CDK2/POLK/CDKN1B/PIK3CB/MAPK9/PSMD12/EIF2AK2/AKT2/JAK1/CASP8/TAB2/CHUK/SNW1/PSMD2/NFKB1/IRAK4/TAB1/NCOR2/PSMD3/MYD88/PSMC2/MAP2K7/CASP3/PIK3R1/MAP2K4/NEDD4/RELA/CCNE2/BCL2L11/E2F3/OAS3/AKT1/FADD/STAT2/MAP3K7/RB1/HDAC2/PSMC6/MAVS/STAT3/IFNAR1/HDAC1/DDX58/SKP2/PIK3R2/TNFAIP3/PSMD6/CIR1/JUN/LYN/TRAF3/CDK4/CCNA2/TAP2/PSMD14/CASP9/PSMD8/NFKBIA/MAP3…
hsa05170	hsa05170	Human immunodeficiency virus 1 infection	207	0.629383	1.57448	0.0001	0.000242872	8.31e-05	10380	tags=57%, list=22%, signal=45%	MAPK14/RIPK1/DCAF1/PPP3R1/TRAF6/PIK3CA/MAPK8/MAPK1/TBK1/MAP2K1/RAF1/CUL5/CUL4A/PAK2/PIK3CB/NFATC3/MAPK9/FBXW11/NRAS/CRKL/ATM/AP1G1/AKT2/CASP8/TAB2/GNAI3/CHUK/PRKCA/GNA11/CUL4B/NFKB1/IRAK4/BTRC/GNAI1/KRAS/TAB1/GNAQ/MYD88/PLCG1/MAP2K7/WEE1/CASP3/PIK3R1/PPP3CB/CUL1/PXN/GNB1/RELA/AKT1/FADD/ITPR2/MAP3K7/PPP3CA/MTOR/PAK1/PAK4/PTK2/TRIM5/GNAI2/SKP1/AP1S2/AP1S3/CALM2/AP1B1/DDB1/PIK3R2/GNG12/AP1M1/RPS6KB1…
hsa05202	hsa05202	Transcriptional misregulation in cancer	168	0.582106	1.44788	0.0001	0.000242872	8.31e-05	12001	tags=55%, list=26%, signal=41%	RXRB/SIN3A/ATF1/BMI1/SP1/KLF3/CCNT1/POLK/COMMD3-BMI1/CDKN1B/ZEB1/KMT2A/DDX5/JMJD1C/ATM/SMAD1/ELK4/NSD2/NFKB1/CCNT2/KDM6A/LDB1/PER2/CDK14/TFE3/TGFBR2/AFF1/REL/FLT1/RELA/RARA/SS18/MEN1/EWSR1/DOT1L/HDAC2/PTK2/MET/NCOR1/TAF15/HDAC1/DUSP6/BCL6/MEIS1/HHEX/MEF2C/JUP/BMP2K/BAIAP3/BCL2L1/PBX3/CDK9/NFKBIZ/CDKN2C/RXRA/MAX/MLLT1/ERG/ETV1/MAF/SUPT3H/TRAF1/BAK1/CEBPA/TCF3/FOXO1/ETV6/RUNX1/SIX4/FLI1/GADD45A/TMP…
hsa05203	hsa05203	Viral carcinogenesis	165	0.639396	1.58931	0.0001	0.000242872	8.31e-05	10380	tags=64%, list=22%, signal=50%	ATF6B/HNRNPK/DLG1/UBE3A/GTF2A1/USP7/EP300/CREBBP/PIK3CA/GTF2H3/ATF2/STAT5B/MAPK1/RASA2/CDK2/DDX3X/CDKN1B/PIK3CB/RBL2/EIF2AK2/CREB1/NRAS/GTF2H2C/GTF2H1/GTF2E1/JAK1/CASP8/SRF/ACTN4/SNW1/CDC42/RHOA/NFKB1/YWHAG/KRAS/YWHAQ/KAT2B/MRPS18B/PRKACB/CASP3/GRB2/PIK3R1/PXN/REL/CREB3L2/IL6ST/RELA/CCNE2/YWHAB/GTF2B/RB1/CREB3L4/RBL1/HDAC2/DNAJA3/GTF2A2/YWHAH/CDKN2B/STAT3/HDAC1/ACTN1/HDAC5/SKP2/GTF2H4/DDB1/PIK3R2…
hsa05205	hsa05205	Proteoglycans in cancer	201	0.592774	1.48197	0.0001	0.000242872	8.31e-05	10796	tags=53%, list=23%, signal=41%	MAPK14/FRS2/PIK3CA/MAPK1/ROCK1/VEGFA/CTNNB1/MAP2K1/SOS1/RAF1/RDX/PTPN11/GAB1/PPP1CB/PIK3CB/SOS2/PPP1R12A/ROCK2/CAMK2G/SMAD2/PDPK1/DDX5/NRAS/CAMK2D/ELK1/ARHGEF12/AKT2/EIF4B/PPP1CC/PRKCA/CDC42/RHOA/KRAS/ITGB1/PLCG1/PRKACB/CASP3/GRB2/PIK3R1/FZD5/PXN/BRAF/PPP1R12B/HIF1A/AKT1/ITPR2/MTOR/KDR/CBL/PAK1/TFAP4/PTK2/MET/VAV2/STAT3/RRAS2/SDC2/PTCH1/SMO/PIK3R2/RPS6KB1/FZD4/CTTN/PRKACA/IQGAP1/ITPR1/ITGA5/EGFR/…
hsa05206	hsa05206	MicroRNAs in cancer	163	0.64905	1.61256	0.0001	0.000242872	8.31e-05	12063	tags=72%, list=26%, signal=54%	HNRNPK/SIRT1/EP300/BMI1/CREBBP/PIK3CA/MAPK1/ROCK1/VEGFA/MAP2K1/APC/SOS1/COMMD3-BMI1/RAF1/RDX/CDKN1B/ZEB1/PIK3CB/SOS2/NRAS/CRKL/ATM/BCL2L2/ABL1/PRKCA/RPTOR/RHOA/NFKB1/KRAS/DICER1/BMPR2/PLCG1/NOTCH2/CASP3/GRB2/PIK3R1/RPS6KA5/BRCA1/CCNE2/BCL2L11/E2F3/UBE2I/MDM4/MTOR/SPRY2/HDAC2/STMN1/PAK4/EZH2/FOXP1/KIF23/MET/STAT3/NOTCH1/PIM1/HDAC1/HDAC5/MAPK7/DNMT3B/PIK3R2/IRS1/HDAC4/PDGFB/SHC1/PTEN/DNMT3A/MCL1/IT…
hsa05210	hsa05210	Colorectal cancer	86	0.663411	1.61156	0.0001	0.000242872	8.31e-05	10114	tags=66%, list=22%, signal=52%	SMAD4/PIK3CA/MAPK8/MAPK1/CTNNB1/MAP2K1/APC/SOS1/POLK/RAF1/MSH2/MLH1/PIK3CB/SOS2/MSH3/MAPK9/SMAD2/APPL1/MSH6/NRAS/AKT2/RHOA/SMAD3/KRAS/TCF7L2/TGFBR2/CASP3/GRB2/PIK3R1/BCL2L11/BRAF/AKT1/MTOR/RALA/RALB/TGFBR1/PIK3R2/RPS6KB1/JUN/AXIN1/EGFR/CASP9/MAPK3/RALGDS/GSK3B/CYCS/RPS6KB2/BAK1/PIK3R3/TCF7/GADD45A/AXIN2/AKT3/BCL2/TGFB2/TCF7L1/CDKN1A
hsa05211	hsa05211	Renal cell carcinoma	69	0.693282	1.66963	0.0001	0.000242872	8.31e-05	6476	tags=61%, list=14%, signal=53%	CUL2/EP300/CREBBP/VHL/PIK3CA/MAPK1/VEGFA/ARNT/MAP2K1/SOS1/RAF1/PTPN11/GAB1/PAK2/PIK3CB/SOS2/NRAS/CRKL/AKT2/CDC42/RAP1A/KRAS/RAP1B/RAPGEF1/FLCN/TFE3/GRB2/PIK3R1/EGLN1/BRAF/HIF1A/AKT1/PAK1/PAK4/MET/ETS1/PIK3R2/PDGFB/JUN/CRK/EPAS1/MAPK3
hsa05212	hsa05212	Pancreatic cancer	75	0.691105	1.67	0.0001	0.000242872	8.31e-05	10515	tags=75%, list=22%, signal=58%	SMAD4/PIK3CA/MAPK8/MAPK1/VEGFA/MAP2K1/POLK/RAF1/PIK3CB/MAPK9/RALBP1/SMAD2/AKT2/JAK1/CHUK/CDC42/NFKB1/SMAD3/KRAS/BRCA2/TGFBR2/PIK3R1/RELA/BRAF/E2F3/AKT1/MTOR/RB1/RALA/STAT3/RALB/TGFBR1/PIK3R2/RPS6KB1/BCL2L1/CDK4/EGFR/CASP9/MAPK3/RALGDS/RPS6KB2/ARHGEF6/BAK1/RAD51/E2F2/PIK3R3/STAT1/CDK6/GADD45A/AKT3/TGFB2/PLD1/IKBKB/E2F1/CDKN1A/TGFB3
hsa05214	hsa05214	Glioma	75	0.625728	1.51202	0.0001	0.000242872	8.31e-05	10114	tags=57%, list=22%, signal=45%	PIK3CA/MAPK1/MAP2K1/SOS1/POLK/RAF1/PIK3CB/SOS2/CAMK2G/NRAS/CAMK2D/AKT2/PRKCA/KRAS/PLCG1/GRB2/PIK3R1/BRAF/E2F3/AKT1/MTOR/RB1/CALM2/PIK3R2/PDGFB/SHC1/PTEN/CALM1/CDK4/CALM3/EGFR/MAPK3/BAK1/CAMK1D/E2F2/PIK3R3/CDK6/GADD45A/AKT3/PLCG2/E2F1/PDGFRB/CDKN1A
hsa05215	hsa05215	Prostate cancer	97	0.631131	1.54008	0.0001	0.000242872	8.31e-05	11320	tags=65%, list=24%, signal=49%	EP300/CREBBP/PIK3CA/MAPK1/CTNNB1/MAP2K1/CDK2/SOS1/RAF1/CDKN1B/ZEB1/PIK3CB/SOS2/CREB1/PDPK1/NRAS/AKT2/HSP90AB1/CHUK/NFKB1/KRAS/TCF7L2/GRB2/PIK3R1/CREB3L2/RELA/CCNE2/BRAF/E2F3/AKT1/PDGFC/MTOR/RB1/CREB3L4/PIK3R2/PDGFB/PTEN/EGFR/CASP9/MAPK3/GSK3B/NFKBIA/ERG/HSP90AA1/PDGFD/FOXO1/E2F2/PIK3R3/TCF7/TMPRSS2/AKT3/BCL2/PLAU/FGFR1/TCF7L1/IKBKB/E2F1/PDGFRB/CDKN1A/PLAT/IGF1R/PDGFA/AR
hsa05220	hsa05220	Chronic myeloid leukemia	76	0.688324	1.66446	0.0001	0.000242872	8.31e-05	10515	tags=72%, list=22%, signal=56%	SMAD4/PIK3CA/STAT5B/MAPK1/MAP2K1/SOS1/POLK/RAF1/PTPN11/CDKN1B/PIK3CB/SOS2/NRAS/CRKL/AKT2/CHUK/ABL1/NFKB1/SMAD3/KRAS/TGFBR2/GRB2/PIK3R1/GAB2/RELA/CTBP1/BRAF/E2F3/AKT1/RB1/CBL/HDAC2/TGFBR1/HDAC1/PIK3R2/SHC1/BCL2L1/CDK4/CRK/MAPK3/NFKBIA/MECOM/BAK1/E2F2/PIK3R3/CDK6/RUNX1/GADD45A/BCR/AKT3/TGFB2/IKBKB/E2F1/CDKN1A/TGFB3
hsa05221	hsa05221	Acute myeloid leukemia	66	0.646958	1.5548	0.0001	0.000242872	8.31e-05	10756	tags=64%, list=23%, signal=49%	PIK3CA/STAT5B/MAPK1/MAP2K1/SOS1/RAF1/PIK3CB/SOS2/NRAS/AKT2/CHUK/NFKB1/KRAS/PER2/TCF7L2/GRB2/PIK3R1/RELA/RARA/BRAF/AKT1/PPARD/MTOR/STAT3/PIM1/DUSP6/PIK3R2/JUP/RPS6KB1/MAPK3/RPS6KB2/CEBPA/PIK3R3/TCF7/RUNX1/AKT3/TCF7L1/IKBKB/KIT/ITGAM/PML/PIM2
hsa05222	hsa05222	Small cell lung cancer	93	0.613697	1.4947	0.0001	0.000242872	8.31e-05	13513	tags=71%, list=29%, signal=51%	RXRB/TRAF6/PIK3CA/APAF1/CDK2/POLK/CDKN1B/PIK3CB/AKT2/CHUK/NFKB1/BIRC2/ITGB1/CASP3/PIK3R1/RELA/CCNE2/XIAP/E2F3/ITGA6/AKT1/RB1/PTK2/LAMC1/CDKN2B/SKP2/PIK3R2/COL4A1/PTEN/BCL2L1/TRAF3/CDK4/RXRA/CASP9/MAX/ITGAV/NFKBIA/TRAF4/COL4A2/CYCS/ITGA2/TRAF1/BAK1/E2F2/PIK3R3/CDK6/GADD45A/CKS1B/AKT3/BCL2/IKBKB/E2F1/CDKN1A/FN1/TRAF5/TRAF2/RARB/COL4A4/LAMA3/TP53/LAMB3/CCNE1/COL4A5/LAMA2/NOS2/LAMA4
hsa05223	hsa05223	Non-small cell lung cancer	66	0.6607	1.58783	0.0001	0.000242872	8.31e-05	10114	tags=65%, list=22%, signal=51%	RXRB/PIK3CA/STAT5B/MAPK1/MAP2K1/SOS1/POLK/RAF1/PIK3CB/SOS2/PDPK1/NRAS/STK4/AKT2/PRKCA/EML4/KRAS/PLCG1/GRB2/PIK3R1/BRAF/E2F3/AKT1/FOXO3/RB1/STAT3/PIK3R2/RASSF5/CDK4/RXRA/EGFR/CASP9/MAPK3/BAK1/E2F2/RASSF1/PIK3R3/CDK6/GADD45A/AKT3/PLCG2/E2F1/CDKN1A
hsa05224	hsa05224	Breast cancer	147	0.581116	1.43922	0.0001	0.000242872	8.31e-05	10850	tags=50%, list=23%, signal=38%	SP1/PIK3CA/MAPK1/CTNNB1/MAP2K1/APC/SOS1/POLK/RAF1/PIK3CB/SOS2/NRAS/DVL3/NCOA1/AKT2/CSNK1A1/KRAS/DVL2/TCF7L2/BRCA2/NOTCH2/NCOA3/LRP6/GRB2/PIK3R1/FZD5/BRCA1/BRAF/E2F3/AKT1/MTOR/RB1/NOTCH1/DLL4/PIK3R2/SHC1/PTEN/RPS6KB1/FZD4/JUN/AXIN1/CDK4/EGFR/MAPK3/NOTCH3/GSK3B/FLT4/FZD6/JAG1/RPS6KB2/BAK1/FZD1/FZD3/E2F2/WNT3/PIK3R3/CDK6/TCF7/HEY1/GADD45A/AXIN2/DVL1/AKT3/FGFR1/TCF7L1/E2F1/KIT/CDKN1A/HEY2/IGF1R/WNT5A…
hsa05225	hsa05225	Hepatocellular carcinoma	167	0.604632	1.50357	0.0001	0.000242872	8.31e-05	10850	tags=53%, list=23%, signal=41%	ARID1A/SMARCC2/PBRM1/SMAD4/PIK3CA/MAPK1/CTNNB1/MAP2K1/APC/SOS1/POLK/RAF1/GAB1/PIK3CB/SOS2/NFE2L2/SMAD2/NRAS/DVL3/SMARCC1/ELK1/ARID1B/SMARCE1/AKT2/CSNK1A1/PRKCA/ARID2/SMAD3/KRAS/DVL2/TCF7L2/PLCG1/LRP6/TGFBR2/GRB2/PIK3R1/FZD5/ACTL6A/SMARCD1/BRAF/E2F3/AKT1/MTOR/RB1/SMARCA2/MET/SMARCD2/SMARCB1/TGFBR1/PIK3R2/SHC1/PTEN/RPS6KB1/FZD4/BCL2L1/AXIN1/CDK4/EGFR/MAPK3/GSK3B/GSTA4/FZD6/PHF10/RPS6KB2/BAK1/FZD1/T…
hsa05226	hsa05226	Gastric cancer	149	0.587656	1.45638	0.0001	0.000242872	8.31e-05	11035	tags=50%, list=23%, signal=38%	RXRB/SMAD4/PIK3CA/MAPK1/CTNNB1/MAP2K1/APC/CDK2/SOS1/POLK/RAF1/GAB1/CDKN1B/MLH1/PIK3CB/SOS2/SMAD2/NRAS/DVL3/AKT2/CSNK1A1/SMAD3/KRAS/DVL2/TCF7L2/LRP6/TGFBR2/GRB2/PIK3R1/FZD5/CCNE2/CTNNA1/BRAF/E2F3/AKT1/MTOR/RB1/MET/CDKN2B/TGFBR1/PIK3R2/JUP/SHC1/RPS6KB1/FZD4/AXIN1/RXRA/EGFR/MAPK3/GSK3B/FZD6/RPS6KB2/BAK1/FZD1/FZD3/E2F2/WNT3/PIK3R3/TCF7/GADD45A/AXIN2/DVL1/AKT3/BCL2/TGFB2/TCF7L1/E2F1/CDKN1A/SHH/TGFB3/W…
hsa05231	hsa05231	Choline metabolism in cancer	98	0.631598	1.54158	0.0001	0.000242872	8.31e-05	7263	tags=52%, list=15%, signal=44%	SP1/PIK3CA/PIP5K1A/MAPK8/MAPK1/MAP2K1/SOS1/RAF1/PIK3CB/SOS2/MAPK9/PDPK1/NRAS/PCYT1A/AKT2/PRKCA/KRAS/PLCG1/RHEB/GRB2/PIK3R1/WASF2/TSC1/HIF1A/PLPP3/AKT1/PDGFC/MTOR/DGKD/SLC22A5/JMJD7-PLA2G4B/GPCPD1/WASF1/PIK3R2/LYPLA1/PDGFB/DGKQ/RPS6KB1/JUN/DGKZ/CHPT1/EGFR/MAPK3/RALGDS/CHKA/DGKH/PLD2/TSC2/PIP5K1C/PDGFD/RPS6KB2
hsa05235	hsa05235	PD-L1 expression and PD-1 checkpoint pathway in cancer	89	0.65856	1.60212	0.0001	0.000242872	8.31e-05	9291	tags=60%, list=20%, signal=48%	MAPK14/PPP3R1/TRAF6/PIK3CA/MAPK1/MAP2K1/RAF1/PTPN11/PIK3CB/NFATC3/CSNK2A1/TIRAP/NRAS/MAP3K3/AKT2/JAK1/CHUK/NFKB1/EML4/KRAS/MYD88/PLCG1/PIK3R1/PPP3CB/RELA/HIF1A/AKT1/PPP3CA/MTOR/CSNK2A3/JAK2/TICAM1/STAT3/CSNK2B/CSNK2A2/PIK3R2/PTEN/RPS6KB1/JUN/NFATC2/EGFR/MAPK3/PPP3CC/NFKBIA/TLR4/RPS6KB2/IFNGR2/TICAM2/PIK3R3/STAT1/AKT3/IFNGR1/CD28
hsa05418	hsa05418	Fluid shear stress and atherosclerosis	137	0.558566	1.38053	0.0001	0.000242872	8.31e-05	13774	tags=58%, list=29%, signal=41%	MAPK14/PIK3CA/MAPK8/VEGFA/CTNNB1/SUMO2/PIK3CB/NFE2L2/MAPK9/BMPR1A/MEF2A/AKT2/HSP90AB1/PIAS4/CHUK/RHOA/NFKB1/PRKAA1/BMPR2/ACVR1/MAP2K7/SUMO1/PIK3R1/MAP2K4/ACVR2A/RELA/AKT1/MAP3K7/KDR/PTK2/SDC2/CALM2/MAPK7/SUMO3/MEF2C/PIK3R2/CDH5/PDGFB/CALM1/JUN/MAP2K5/CALM3/IL1R1/ITGAV/GSTA4/PECAM1/HSP90AA1/CAV1/PRKAA2/TNFRSF1A/PIK3R3/CAV2/ITGB3/SRC/NOS3/EDN1/ACTG1/BMP4/AKT3/BCL2/MAP3K5/IKBKB/GSTM4/PLAT/MAP2K6/PDG…
hsa03460	hsa03460	Fanconi anemia pathway	54	0.679105	1.61467	0.0001	0.000242872	8.31e-05	10034	tags=74%, list=21%, signal=58%	POLH/RMI1/REV1/FAN1/PMS2/USP1/WDR48/POLK/ERCC4/RPA1/MLH1/FANCF/SLX4/BRIP1/BRCA2/FANCE/TOP3B/BRCA1/REV3L/POLI/RPA2/CENPS/FANCM/FANCL/FAAP24/TOP3A/FAAP100/RAD51C/FANCD2/UBE2T/PALB2/RMI2/RAD51/FANCC/SLX1B/FANCI/EME2/FANCB/EME1/MUS81
hsa04213	hsa04213	Longevity regulating pathway - multiple species	62	0.713382	1.70925	0.0001	0.000242872	8.31e-05	8206	tags=65%, list=17%, signal=53%	SIRT1/PIK3CA/PIK3CB/NRAS/HSPA1L/AKT2/RPTOR/PRKAA1/PRKAG1/ADCY6/KRAS/PRKACB/PIK3R1/ADCY9/EIF4EBP2/AKT1/MTOR/ATG5/FOXO3/HDAC2/PRKAB2/FOXA2/HDAC1/PIK3R2/IRS1/RPS6KB1/PRKACA/INSR/PRKAG2/PRKAB1/HSPA1B/HSPA1A/HSPA8/RPS6KB2/PRKAA2/IRS2/FOXO1/CAT/PIK3R3/ADCY7
hsa05130	hsa05130	Pathogenic Escherichia coli infection	54	0.612243	1.45569	0.0001	0.000242872	8.31e-05	13070	tags=65%, list=28%, signal=47%	NCK1/WASL/ROCK1/CTNNB1/ROCK2/ABL1/PRKCA/CDC42/RHOA/NCL/TUBB/TUBA1B/ARPC5/ITGB1/OCLN/YWHAQ/TUBA1C/ARPC4/CTTN/ARPC2/CLDN1/TLR4/TLR5/ACTG1/YWHAZ/NCK2/FYN/TUBA1A/TUBB2B/TUBB1/CDH1/ARHGEF2/TUBB4A/TUBB2A/EZR
hsa05134	hsa05134	Legionellosis	56	0.611185	1.45679	0.0001	0.000242872	8.31e-05	12691	tags=64%, list=27%, signal=47%	APAF1/HSPA1L/CASP8/NFKB1/BCL2L13/SEC22B/MYD88/HBS1L/CASP3/RAB1A/VCP/CASP7/RELA/RAB1B/CLK4/ARF1/SAR1B/SAR1A/CASP9/HSPA1B/NFKBIA/TLR4/HSPA1A/HSPA8/CYCS/BNIP3/HSPD1/TLR5/NAIP/EEF1G/ITGAM/TLR2/HSPA2/NFKB2/IL12A/IL1B
hsa05213	hsa05213	Endometrial cancer	58	0.66461	1.58678	0.0001	0.000242872	8.31e-05	10114	tags=67%, list=22%, signal=53%	PIK3CA/MAPK1/CTNNB1/MAP2K1/APC/SOS1/POLK/RAF1/MLH1/PIK3CB/SOS2/PDPK1/NRAS/ELK1/AKT2/KRAS/TCF7L2/GRB2/PIK3R1/CTNNA1/BRAF/AKT1/FOXO3/PIK3R2/PTEN/AXIN1/EGFR/CASP9/MAPK3/GSK3B/ILK/BAK1/PIK3R3/TCF7/GADD45A/AXIN2/AKT3/TCF7L1/CDKN1A
hsa00510	hsa00510	N-Glycan biosynthesis	50	0.668907	1.58392	0.00010001	0.000242872	8.31e-05	11187	tags=72%, list=24%, signal=55%	GANAB/STT3B/ALG10/MGAT2/MAN2A1/ALG6/MAN2A2/DPM1/ALG10B/ALG12/MAN1A2/MOGS/ALG14/RPN1/STT3A/ALG11/ALG2/DOLPP1/ALG13/DPAGT1/DDOST/B4GALT3/B4GALT1/MGAT4A/DOLK/MAN1A1/MGAT4B/MGAT5/ST6GAL1/MGAT1/FUT8/ALG1/RPN2/MAN1C1/ALG5/DAD1
hsa05110	hsa05110	Vibrio cholerae infection	50	0.64043	1.51649	0.00010001	0.000242872	8.31e-05	11652	tags=62%, list=25%, signal=47%	TJP1/ATP6V1A/PRKCA/PLCG1/ATP6V0A2/PRKACB/ADCY9/TJP2/ARF1/KDELR2/ATP6V1D/PDIA4/SEC61A2/ATP6V1B2/PRKACA/ATP6V1C1/ATP6AP1/ERO1A/ATP6V1G2/ATP6V1E2/ATP6V1E1/ATP6V1G1/SEC61A1/KDELR1/ACTG1/PLCG2/ATP6V0D1/GNAS/ADCY3/ATP6V0C/SLC12A2
hsa04330	hsa04330	Notch signaling pathway	48	0.670959	1.58482	0.00010003	0.000242872	8.31e-05	9661	tags=60%, list=21%, signal=48%	EP300/CREBBP/MAML1/APH1A/DVL3/NCSTN/SNW1/ADAM17/NUMB/NCOR2/DVL2/PSEN1/NOTCH2/KAT2B/DTX3L/CTBP1/HDAC2/MAML3/NOTCH1/HDAC1/DLL4/CIR1/MAML2/NOTCH3/JAG1/PSEN2/DVL1/NUMBL/KAT2A
hsa03022	hsa03022	Basal transcription factors	44	0.732137	1.7205	0.00010004	0.000242872	8.31e-05	5129	tags=64%, list=11%, signal=57%	GTF2A1/GTF2I/TAF1/TAF11/TAF4/GTF2H3/ERCC3/TAF2/TAF5L/GTF2H2C/TAF9B/GTF2H1/GTF2E1/TAF8/TAF3/TAF6L/TAF5/MNAT1/GTF2F1/TAF12/TAF6/GTF2B/TAF7/TAF9/GTF2A2/TAF13/TAF15/GTF2H4
hsa00600	hsa00600	Sphingolipid metabolism	47	0.659061	1.55447	0.00010005	0.000242872	8.31e-05	8598	tags=55%, list=18%, signal=45%	SPTLC1/SGMS1/CERS2/KDSR/SGPL1/PLPP3/NEU1/NEU3/B4GALT6/GLB1/SMPD4/SGMS2/SPTLC2/SPHK2/CERK/ACER2/SGPP1/CERS6/GALC/GBA2/DEGS1/SPTLC3/UGCG/ACER3/ASAH1/ASAH2
hsa03420	hsa03420	Nucleotide excision repair	46	0.709487	1.67111	0.00010006	0.000242872	8.31e-05	7669	tags=65%, list=16%, signal=55%	XPC/RFC1/GTF2H3/CUL4A/ERCC3/RAD23B/ERCC4/RPA1/GTF2H2C/RFC3/GTF2H1/RFC5/CUL4B/POLE3/ERCC6/POLD3/ERCC8/PCNA/RPA2/MNAT1/BIVM-ERCC5/RAD23A/GTF2H4/DDB1/GTF2H2/CDK7/XPA/RFC2/RFC4/CETN2
hsa03440	hsa03440	Homologous recombination	41	0.659193	1.54066	0.00010011	0.000242872	8.31e-05	10034	tags=71%, list=21%, signal=56%	TOPBP1/RPA1/BRCC3/MRE11/ATM/ABRAXAS1/RAD50/RAD52/BRIP1/BRCA2/RAD51D/POLD3/TOP3B/BRCA1/RPA2/BARD1/XRCC3/XRCC2/UIMC1/NBN/TOP3A/RAD51B/RAD51C/PALB2/RAD51/EME1/BABAM2/RBBP8/MUS81
hsa00513	hsa00513	Various types of N-glycan biosynthesis	39	0.654078	1.52259	0.00010013	0.000242872	8.31e-05	12846	tags=74%, list=27%, signal=54%	STT3B/MGAT2/MAN2A1/MAN2A2/ALG12/MAN1A2/ALG14/RPN1/STT3A/ALG11/ALG2/ALG13/DDOST/B4GALT3/B4GALT1/MGAT4A/MAN1A1/MGAT4B/CHST9/MGAT1/FUT8/ALG1/RPN2/MAN1C1/ST3GAL3/DAD1/ALG3/TUSC3/B4GALT2
hsa04130	hsa04130	SNARE interactions in vesicular transport	34	0.70519	1.62888	0.00010022	0.000242872	8.31e-05	9847	tags=71%, list=21%, signal=56%	GOSR1/STX17/SNAP23/VAMP4/VAMP7/VTI1A/STX16/SEC22B/STX7/BET1L/GOSR2/VAMP3/BET1/STX6/STX2/STX18/STX5/YKT6/VAMP2/STX1A/VAMP1/STX3/SNAP29/STX1B
hsa04136	hsa04136	Autophagy - other	32	0.744588	1.71234	0.000100331	0.000242872	8.31e-05	9576	tags=78%, list=20%, signal=62%	PPP2CA/ATG4C/PIK3R4/ATG3/RPTOR/ATG16L1/ATG2B/BECN1/WIPI2/ATG9A/MTOR/ATG5/PIK3C3/IGBP1/ATG13/GABARAPL2/PPP2CB/ATG12/ATG4B/ATG101/ATG10/ATG7/MLST8/ATG4A/ULK2
hsa04710	hsa04710	Circadian rhythm	30	0.726825	1.66235	0.000100432	0.000242872	8.31e-05	10111	tags=83%, list=21%, signal=65%	CREB1/FBXW11/CLOCK/FBXL3/PRKAA1/PER3/CRY1/PRKAG1/BTRC/PER2/CSNK1D/CUL1/ARNTL/PRKAB2/CRY2/SKP1/BHLHE40/CSNK1E/PRKAG2/PRKAB1/NR1D1/PRKAA2/RORC/RORA/NPAS2
hsa00970	hsa00970	Aminoacyl-tRNA biosynthesis	25	0.75338	1.6973	0.000100888	0.000242872	8.31e-05	8073	tags=76%, list=17%, signal=63%	AARS2/LARS2/IARS2/DARS2/FARS2/MTFMT/HARS2/VARS2/MARS2/GATC/SEPSECS/PARS2/WARS2/QRSL1/RARS2/TARS2/FARSA/FARSB/NARS2
hsa03060	hsa03060	Protein export	23	0.750499	1.67786	0.000101133	0.000242872	8.31e-05	9830	tags=83%, list=21%, signal=65%	SRP54/SRP72/SRP9/SRPRA/SPCS2/SRP68/SEC11A/SEC61A2/SEC63/OXA1L/SRP14/SPCS1/SEC62/SEC61A1/HSPA5/SRPRB/SPCS3/SRP19/IMMP1L
hsa04540	hsa04540	Gap junction	88	0.598661	1.45588	0.00019998	0.000452268	0.000154686	13914	tags=67%, list=30%, signal=47%	TJP1/MAP3K2/MAPK1/MAP2K1/SOS1/RAF1/SOS2/NRAS/GNAI3/PRKCA/GNA11/ADCY6/TUBB/GNAI1/KRAS/TUBA1B/GNAQ/PRKACB/CSNK1D/GRB2/TUBA1C/ADCY9/ITPR2/PDGFC/GNAI2/MAPK7/PDGFB/GJA1/PRKACA/PLCB3/CDK1/MAP2K5/ITPR1/EGFR/MAPK3/GUCY1B1/PDGFD/GUCY1A1/ADCY7/PLCB1/SRC/GUCY1A2/ITPR3/PDGFRB/GNAS/ADCY5/PDGFA/ADCY3/TUBA1A/TUBB2B/TUBB1/DRD1/TUBB4A/TUBB2A/PRKG1/PLCB4/EGF/PRKCB/TUBA3C
hsa04657	hsa04657	IL-17 signaling pathway	93	0.586009	1.42726	0.00019998	0.000452268	0.000154686	6984	tags=34%, list=15%, signal=29%	MAPK14/TRAF6/MAPK8/MAPK1/TBK1/MAPK9/SRSF1/TAB3/MAPK6/HSP90AB1/CASP8/TAB2/CHUK/USP25/NFKB1/ELAVL1/CASP3/RELA/FADD/MAP3K7/IL17RA/IL17RC/MAPK7/TNFAIP3/JUN/TRAF3/MAPK3/GSK3B/NFKBIA/ANAPC5/TRAF4/HSP90AA1
hsa04662	hsa04662	B cell receptor signaling pathway	79	0.598848	1.44993	0.00019998	0.000452268	0.000154686	9975	tags=51%, list=21%, signal=40%	PPP3R1/PIK3CA/MAPK1/MAP2K1/SOS1/RAF1/PIK3CB/SOS2/NFATC3/NRAS/AKT2/CHUK/NFKB1/MALT1/KRAS/INPPL1/BCL10/GRB2/PIK3R1/PPP3CB/RELA/AKT1/PPP3CA/VAV2/PIK3R2/JUN/LYN/NFATC2/RASGRP3/MAPK3/GSK3B/PPP3CC/NFKBIA/PIK3R3/BLNK/PIK3AP1/VAV3/AKT3/IKBKB/PLCG2
hsa04670	hsa04670	Leukocyte transendothelial migration	112	0.556884	1.36656	0.00019998	0.000452268	0.000154686	12275	tags=53%, list=26%, signal=39%	MAPK14/PIK3CA/ARHGAP5/CTNND1/ROCK1/CTNNB1/PTPN11/PIK3CB/ROCK2/ACTN4/GNAI3/PRKCA/CDC42/RHOA/AFDN/RAP1A/GNAI1/ITGB1/OCLN/RAP1B/PLCG1/PIK3R1/PXN/CTNNA1/ARHGAP35/PTK2/GNAI2/VCL/VAV2/ACTN1/PIK3R2/CDH5/CLDN23/RASSF5/CLDN1/BCAR1/PTK2B/CLDN16/PECAM1/RAPGEF4/ITGA4/MSN/F11R/ESAM/PIK3R3/VAV3/JAM3/ACTG1/CLDN20/THY1/ITGAL/PLCG2/ITGAM/CD99/CXCR4/CTNNA3/CLDN11/NCF2/MYL12A
hsa04725	hsa04725	Cholinergic synapse	112	0.556874	1.36654	0.00019998	0.000452268	0.000154686	13820	tags=55%, list=29%, signal=39%	PIK3CA/MAPK1/MAP2K1/PIK3CB/CREB1/CAMK2G/NRAS/CAMK2D/AKT2/GNAI3/PRKCA/GNA11/ADCY6/GNAI1/KRAS/GNAQ/PRKACB/PIK3R1/CREB3L2/GNB1/ADCY9/AKT1/ITPR2/JAK2/CREB3L4/GNAI2/PIK3R2/GNG12/PRKACA/PLCB3/GNG10/ITPR1/MAPK3/KCNJ2/PIK3R3/ADCY7/PLCB1/CHRM3/GNB5/GNB2/AKT3/BCL2/ITPR3/GNG2/GNB4/PIK3CG/CHRM5/ADCY5/ADCY3/FYN/GNG7/CACNA1C/CACNA1D/KCNQ1/CREB3/GNG5/GNG3/KCNJ3/PLCB4/CAMK4/PIK3R5/PRKCB
hsa04928	hsa04928	Parathyroid hormone synthesis, secretion and action	106	0.569308	1.39401	0.00019998	0.000452268	0.000154686	11520	tags=52%, list=24%, signal=39%	ATF6B/RXRB/SP1/ATF2/MAPK1/MAP2K1/RAF1/CREB1/GNA13/MEF2A/ARHGEF11/GNAI3/PRKCA/GNA11/RHOA/ADCY6/GNAI1/GNAQ/LRP6/PRKACB/CREB3L2/ADCY9/BRAF/MEF2D/ITPR2/CREB3L4/GNAI2/GNA12/MEF2C/PRKACA/SLC9A3R1/NACA/PLCB3/RXRA/ITPR1/MAFB/EGFR/MAPK3/PLD2/MMP14/ADCY7/PLCB1/KL/BCL2/ITPR3/PLD1/FGFR1/MMP24/CDKN1A/HBEGF/GNAS/ADCY5/VDR/ADCY3/NR4A2
hsa04962	hsa04962	Vasopressin-regulated water reabsorption	44	0.640314	1.50472	0.00020008	0.000452268	0.000154686	12823	tags=70%, list=27%, signal=51%	RAB5A/RAB5B/DCTN4/RAB5C/NSF/CREB1/DYNC1LI2/ADCY6/DYNLL2/DCTN2/PRKACB/CREB3L2/DYNC1I2/ADCY9/RAB11A/DYNC2LI1/DCTN5/CREB3L4/DCTN6/DYNC1LI1/PRKACA/RAB11B/VAMP2/DYNC2H1/GNAS/ADCY3/DYNLL1/DYNC1I1/AQP3/CREB3/DYNC1H1
hsa03030	hsa03030	DNA replication	36	0.664411	1.53922	0.000200381	0.000452268	0.000154686	7376	tags=61%, list=16%, signal=52%	RFC1/PRIM2/RPA1/MCM3/POLA1/RFC3/RFC5/POLE3/POLD3/PRIM1/PCNA/MCM4/RPA2/MCM2/MCM6/DNA2/MCM5/RNASEH1/FEN1/MCM7/RFC2/RFC4
hsa00563	hsa00563	Glycosylphosphatidylinositol (GPI)-anchor biosynthesis	25	0.716341	1.61385	0.000201776	0.000452268	0.000154686	6683	tags=64%, list=14%, signal=55%	PIGK/PIGN/PIGM/PIGW/PIGX/PIGY/PIGS/PIGC/PIGV/PIGA/PIGF/PGAP1/PIGT/PIGH/PIGO/PIGP
hsa00900	hsa00900	Terpenoid backbone biosynthesis	22	0.728545	1.622	0.000202593	0.000452268	0.000154686	7195	tags=59%, list=15%, signal=50%	ZMPSTE24/PCYOX1/FNTB/ICMT/NUS1/HMGCR/GGPS1/RCE1/DHDDS/IDI1/PDSS2/FNTA/HMGCS1
hsa00230	hsa00230	Purine metabolism	127	0.546209	1.34607	0.00029997	0.000650713	0.000222558	13162	tags=54%, list=28%, signal=39%	DCK/RRM1/PAICS/GART/ADCY6/GMPS/NT5C2/PRUNE1/PDE6D/PPAT/PAPSS1/PDE8A/ENPP4/PRPS1/ADCY9/PGM2/PFAS/ENTPD4/AMPD2/NT5C1B/PRPS2/CANT1/GMPR2/NT5C3A/AK3/RRM2/AK9/AK6/HPRT1/NME1-NME2/PDE3B/NME6/ENTPD5/RRM2B/PDE7A/PGM1/NUDT16/NUDT9/GUCY1B1/GUCY1A1/AK2/PNP/AMPD3/ADSL/ADCY7/ADK/ENTPD6/GUCY1A2/ENPP1/NUDT5/PDE5A/ENTPD1/AK7/AK4/HDDC3/PDE8B/PKLR/PAPSS2/ADCY5/ADA2/NTPCR/ADCY3/ADPRM/PDE3A/PDE7B/NT5M/PDE4B/XDH
hsa04115	hsa04115	p53 signaling pathway	72	0.593677	1.43229	0.00029997	0.000650713	0.000222558	10114	tags=56%, list=22%, signal=44%	PPM1D/APAF1/CDK2/ATM/CASP8/SIAH1/RCHY1/CCNG2/CASP3/CCNE2/GORAB/MDM4/EI24/CD82/RRM2/TNFRSF10B/PTEN/BCL2L1/RRM2B/CDK1/CDK4/GTSE1/TP73/CASP9/ZMAT3/CHEK1/TSC2/CYCS/CCNB2/FAS/CCNG1/CDK6/PIDD1/GADD45A/CCND3/SESN3/BCL2/SESN1/CCNB1/CDKN1A
hsa04664	hsa04664	Fc epsilon RI signaling pathway	67	0.589746	1.41836	0.00029997	0.000650713	0.000222558	6476	tags=40%, list=14%, signal=35%	MAPK14/PIK3CA/MAPK8/MAPK1/MAP2K1/SOS1/RAF1/PIK3CB/SOS2/MAPK9/PDPK1/NRAS/AKT2/PRKCA/KRAS/PLCG1/MAP2K7/GRB2/PIK3R1/GAB2/MAP2K4/AKT1/JMJD7-PLA2G4B/VAV2/PIK3R2/LYN/MAPK3
hsa04713	hsa04713	Circadian entrainment	97	0.564258	1.3769	0.00029997	0.000650713	0.000222558	13820	tags=55%, list=29%, signal=39%	MAPK1/CREB1/CAMK2G/CAMK2D/GNAI3/PRKCA/PER3/ADCY6/GNAI1/GNAQ/PER2/PRKACB/GNB1/RPS6KA5/ADCY9/NOS1AP/GNAI2/CALM2/GNG12/PRKACA/CALM1/PLCB3/GNG10/CALM3/ITPR1/MAPK3/GUCY1B1/GUCY1A1/ADCY7/PLCB1/GNB5/GUCY1A2/GNB2/ITPR3/GRIN2C/GNG2/GNB4/GNAS/ADCY5/PER1/ADCY3/GNG7/RYR3/CACNA1C/RYR2/CACNA1D/GNG5/PRKG1/GNG3/KCNJ3/PLCB4/CALML4/PRKCB
hsa04392	hsa04392	Hippo signaling pathway - multiple species	28	0.693431	1.57752	0.00030175	0.000650713	0.000222558	13491	tags=89%, list=29%, signal=64%	TEAD1/MOB1A/TEAD3/YAP1/LIMD1/LATS1/LATS2/AJUBA/WWTR1/PAK1/MOB1B/SAV1/STK3/NF2/CSNK1E/DCHS1/FAT4/FRMD6/RASSF1/RASSF4/TEAD2/RASSF2/WTIP/DCHS2/RASSF6
hsa03450	hsa03450	Non-homologous end-joining	13	0.810068	1.69328	0.000313742	0.000672001	0.000229839	6573	tags=85%, list=14%, signal=73%	MRE11/PRKDC/RAD50/POLM/LIG4/NHEJ1/XRCC5/XRCC6/XRCC4/DCLRE1C/FEN1
hsa05230	hsa05230	Central carbon metabolism in cancer	68	0.586652	1.41198	0.00039996	0.000850922	0.000291034	11936	tags=59%, list=25%, signal=44%	PIK3CA/MAPK1/MAP2K1/RAF1/PIK3CB/NRAS/AKT2/KRAS/PIK3R1/IDH1/HIF1A/AKT1/MTOR/SIRT3/MET/PGAM1/PIK3R2/PTEN/PDHB/LDHA/EGFR/MAPK3/TIGAR/PFKM/PIK3R3/GLS/AKT3/PDHA1/FGFR1/PFKL/PDGFRB/KIT/SLC2A1/FGFR3/PDK1/SLC2A2/G6PD/PGAM4/TP53/LDHAL6B
hsa00564	hsa00564	Glycerophospholipid metabolism	96	0.558345	1.36183	0.00049995	0.00104339	0.000356862	12402	tags=53%, list=26%, signal=39%	CEPT1/PCYT1A/AGPAT1/AGPAT3/ETNK1/PGS1/LCLAT1/PLPP3/GPD2/SELENOI/MBOAT1/DGKD/JMJD7-PLA2G4B/GPCPD1/GPAT4/PISD/LPIN2/GNPAT/CDS2/LYPLA1/DGKQ/DGKZ/CHPT1/PLA2G12A/LPGAT1/CHKA/LPIN3/DGKH/PLD2/GPAM/LPIN1/PTDSS1/AGPAT5/PLD3/PLA2G6/LPCAT2/GPD1L/PLPP5/PCYT2/MBOAT7/PLD1/LPCAT3/CRLS1/DGKE/CDIPT/PLA2G15/CDS1/DGKG/GPAT3/ADPRM/MBOAT2
hsa04630	hsa04630	JAK-STAT signaling pathway	159	0.522617	1.29766	0.00049995	0.00104339	0.000356862	10114	tags=38%, list=22%, signal=30%	EP300/CREBBP/PIK3CA/STAT5B/SOCS5/SOS1/RAF1/STAM/PTPN11/PIK3CB/SOS2/SOCS6/STAM2/PIAS3/AKT2/JAK1/PIAS4/PIAS2/SOCS7/GRB2/PIK3R1/SOCS4/IL6ST/AKT1/PIAS1/STAT2/CNTF/MTOR/JAK2/PRLR/IL6R/STAT3/IFNAR1/PIM1/IL13RA1/PIK3R2/IL10RB/PDGFB/STAT6/BCL2L1/IL7/MCL1/EGFR/IFNLR1/MPL/IFNGR2/PIK3R3/FHL1/STAT1/LIFR/EPOR/CCND3/AKT3/IFNGR1/IL23A/BCL2/GHR/IL4R/IL11RA/PDGFRB/CDKN1A
hsa04340	hsa04340	Hedgehog signaling pathway	46	0.627286	1.4775	0.0005003	0.00104339	0.000356862	10431	tags=59%, list=22%, signal=46%	SPOP/FBXW11/CSNK1G3/SPOPL/CSNK1A1/SMURF2/BTRC/SMURF1/PRKACB/CSNK1D/CUL1/CSNK1G1/SUFU/CSNK1G2/CDON/KIF3A/PTCH1/SMO/GRK2/PRKACA/CSNK1E/GSK3B/BCL2/GPR161/CUL3/EVC/SHH
hsa00240	hsa00240	Pyrimidine metabolism	57	0.590832	1.40955	0.00069993	0.00143578	0.000491068	9053	tags=49%, list=19%, signal=40%	DCK/RRM1/NT5C2/UPRT/CMPK1/UCKL1/DPYD/ENTPD4/UMPS/NT5C1B/DCTD/CANT1/NT5C3A/RRM2/DUT/CAD/AK9/NME1-NME2/NME6/ENTPD5/RRM2B/TYMS/CTPS1/CMPK2/PNP/ENTPD6/ENPP1/ENTPD1
hsa04270	hsa04270	Vascular smooth muscle contraction	131	0.53465	1.31922	0.00069993	0.00143578	0.000491068	9453	tags=37%, list=20%, signal=30%	MAPK1/ROCK1/MAP2K1/RAF1/PPP1CB/PPP1R12A/ROCK2/GNA13/ARHGEF12/ARHGEF11/PPP1CC/PRKCA/GNA11/RHOA/ADCY6/GNAQ/MYLK/CALD1/PRKACB/ADCY9/BRAF/PPP1R12B/ITPR2/JMJD7-PLA2G4B/GNA12/CALM2/PRKACA/CALCRL/CALM1/PLCB3/PLA2G12A/CALM3/ITPR1/MAPK3/GUCY1B1/ADORA2A/PRKCD/GUCY1A1/MYLK4/PRKCH/PRKCE/PLA2G6/ADCY7/PLCB1/EDNRA/GUCY1A2/EDN1/ADORA2B/ITPR3
hsa04215	hsa04215	Apoptosis - multiple species	33	0.658141	1.51645	0.000702036	0.00143578	0.000491068	8070	tags=58%, list=17%, signal=48%	BIRC6/MAPK8/APAF1/MAPK9/CASP8/BIRC2/CASP3/CASP7/XIAP/BCL2L11/BECN1/FADD/DIABLO/BCL2L1/CASP9/HTRA2/CYCS/BAK1/TNFRSF1A
hsa04024	hsa04024	cAMP signaling pathway	214	0.501113	1.25496	0.00079992	0.00162548	0.00055595	16331	tags=51%, list=35%, signal=33%	EP300/CREBBP/PIK3CA/MAPK8/MAPK1/ROCK1/MAP2K1/RAF1/PPP1CB/PIK3CB/MAPK9/PPP1R12A/ATP2A2/CREB1/ROCK2/CAMK2G/CAMK2D/AKT2/GNAI3/PPP1CC/RHOA/NFKB1/AFDN/ADCY6/RAP1A/GNAI1/RAP1B/ATP2B1/PRKACB/PIK3R1/CREB3L2/RELA/ADCY9/BRAF/AKT1/PPARA/PAK1/CREB3L4/GNAI2/VAV2/RRAS2/PTCH1/CALM2/PIK3R2/PDE3B/PRKACA/CALM1/JUN/ATP1B1/CALM3/ATP1A1/MAPK3/F2R/NFKBIA/PLD2/RAPGEF4/ADORA2A/SSTR1/PLCE1/PIK3R3/ADCY7/ABCC4/VAV3/EDNRA/E…
hsa04750	hsa04750	Inflammatory mediator regulation of TRP channels	100	0.547854	1.33811	0.00089991	0.00181702	0.00062146	14284	tags=57%, list=30%, signal=40%	MAPK14/PIK3CA/MAPK8/PPP1CB/PIK3CB/MAPK9/CAMK2G/CAMK2D/PPP1CC/PRKCA/ADCY6/GNAQ/PLCG1/PRKACB/PIK3R1/ADCY9/ITPR2/JMJD7-PLA2G4B/IL1RAP/CALM2/PIK3R2/PRKACA/CALM1/PLCB3/CALM3/ITPR1/IL1R1/PRKCD/PRKCH/PRKCE/PIK3R3/PLA2G6/ADCY7/PLCB1/SRC/ITPR3/ASIC5/PLCG2/P2RY2/GNAS/ADCY5/MAP2K6/HRH1/ADCY3/PTGER4/ASIC1/PPP1CA/F2RL1/IL1B/TRPA1/MAPK13/TRPM8/PLCB4/CALML4/PRKCB/ALOX12/MAPK10
hsa04960	hsa04960	Aldosterone-regulated sodium reabsorption	37	0.635282	1.47433	0.0010016	0.00200954	0.000687309	8552	tags=43%, list=18%, signal=35%	PIK3CA/MAPK1/PIK3CB/PDPK1/PRKCA/KRAS/PIK3R1/NR3C2/PIK3R2/IRS1/ATP1B1/INSR/ATP1A1/MAPK3/PIK3R3/HSD11B2
hsa04020	hsa04020	Calcium signaling pathway	192	0.50359	1.25759	0.00109989	0.00219286	0.000750008	16760	tags=59%, list=36%, signal=38%	PPP3R1/ATP2A2/CAMK2G/CAMK2D/STIM1/PRKCA/GNA11/GNAQ/MYLK/ATP2B1/PLCG1/PRKACB/PPP3CB/ADCY9/ITPR2/PPP3CA/LTB4R2/VDAC2/PHKB/SPHK2/CALM2/STIM2/EDNRB/SLC25A5/PRKACA/CALM1/VDAC1/PLCB3/CALM3/MCU/ITPR1/EGFR/F2R/P2RX7/PLCD3/PPP3CC/TPCN1/PTK2B/ADORA2A/VDAC3/ERBB3/MYLK4/PLCE1/CAMK1D/ADCY7/PLCB1/TPCN2/CHRM3/SLC8A1/SLC25A4/EDNRA/NOS3/ADORA2B/ASPH/ITPKB/ITPR3/GRIN2C/ATP2B2/PLCG2/PDGFRB/CYSLTR2/P2RX3/ORAI1/ATP2B…
hsa04924	hsa04924	Renin secretion	69	0.572277	1.37821	0.00119988	0.0023625	0.000808026	17133	tags=70%, list=36%, signal=44%	PPP3R1/CREB1/GNAI3/ADCY6/GNAI1/GNAQ/PRKACB/PPP3CB/ITPR2/PPP3CA/GNAI2/CALM2/PDE3B/PRKACA/CALM1/PLCB3/CALM3/ITPR1/KCNJ2/PPP3CC/GUCY1B1/GUCY1A1/ACE/PLCB1/EDNRA/GUCY1A2/EDN1/CTSB/ITPR3/ORAI1/GNAS/ADCY5/PTGER4/CACNA1C/CACNA1D/PDE3A/ADRB2/ADORA1/PLCB4/CALML4/AGTR1/AGT/PDE1A/EDN2/PDE1B/CACNA1F/AQP1/PRKG2
hsa05218	hsa05218	Melanoma	72	0.57255	1.38132	0.00119988	0.0023625	0.000808026	12682	tags=54%, list=27%, signal=40%	PIK3CA/MAPK1/MAP2K1/POLK/RAF1/PIK3CB/NRAS/AKT2/KRAS/PIK3R1/BRAF/E2F3/AKT1/PDGFC/RB1/MET/PIK3R2/PDGFB/PTEN/CDK4/EGFR/MAPK3/PDGFD/BAK1/E2F2/PIK3R3/CDK6/GADD45A/AKT3/FGFR1/E2F1/PDGFRB/CDKN1A/MITF/IGF1R/PDGFA/TP53/CDH1/FGF2
hsa03430	hsa03430	Mismatch repair	23	0.692718	1.54868	0.00121359	0.00237475	0.000812216	8125	tags=65%, list=17%, signal=54%	PMS2/RFC1/MSH2/RPA1/MLH1/MSH3/MSH6/RFC3/RFC5/POLD3/PCNA/RPA2/RFC2/RFC4/EXO1
hsa03410	hsa03410	Base excision repair	33	0.64451	1.48505	0.00130378	0.00253557	0.000867223	10608	tags=64%, list=23%, signal=49%	LIG3/PARP4/HMGB1/PARP2/POLE3/MBD4/XRCC1/TDG/POLD3/UNG/PCNA/PARP1/PARP3/APEX1/APEX2/FEN1/OGG1/NEIL3/POLL/POLE2/MUTYH
hsa05132	hsa05132	Salmonella infection	80	0.554505	1.34334	0.00219978	0.00424705	0.00145259	9428	tags=41%, list=20%, signal=33%	MAPK14/TJP1/WASL/MAPK8/MAPK1/ROCK1/PKN2/RAB7A/MAPK9/DYNC1LI2/ROCK2/CDC42/NFKB1/ARPC5/MYD88/DYNC1I2/WASF2/RELA/ARPC4/PLEKHM2/WASF1/DYNC1LI1/JUN/ARPC2/KLC4/KLC2/MAPK3/TLR4/IFNGR2/TLR5/ACTG1/IFNGR1/PKN3
hsa03020	hsa03020	RNA polymerase	29	0.649979	1.48326	0.00221061	0.00424705	0.00145259	13170	tags=76%, list=28%, signal=55%	POLR2B/POLR1B/POLR2D/POLR2J3/POLR2A/POLR3B/POLR1A/POLR3A/POLR3E/POLR3F/POLR3C/POLR1C/POLR2C/POLR3GL/POLR3D/POLR3K/POLR1D/POLR3G/POLR2J2/POLR2E/POLR2G/POLR1E
hsa04923	hsa04923	Regulation of lipolysis in adipocytes	55	0.580096	1.38093	0.0025	0.0047741	0.00163285	13902	tags=55%, list=30%, signal=38%	PIK3CA/PIK3CB/AKT2/GNAI3/ADCY6/GNAI1/PRKACB/PIK3R1/ADCY9/ABHD5/AKT1/GNAI2/PIK3R2/IRS1/PDE3B/PRKACA/INSR/IRS2/PNPLA2/PIK3R3/ADCY7/AKT3/GNAS/ADCY5/ADCY3/PTGS1/PRKG1/ADRB2/ADORA1/MGLL
hsa04730	hsa04730	Long-term depression	60	0.575951	1.37772	0.00269973	0.00512464	0.00175274	10765	tags=48%, list=23%, signal=37%	MAPK1/PPP2CA/MAP2K1/RAF1/NRAS/GNA13/GNAI3/PRKCA/GNA11/GNAI1/KRAS/GNAQ/BRAF/ITPR2/JMJD7-PLA2G4B/GNAI2/GNA12/LYN/PLCB3/PPP2CB/ITPR1/MAPK3/GUCY1B1/GUCY1A1/PLCB1/GUCY1A2/ITPR3/GNAS/IGF1R
hsa04658	hsa04658	Th1 and Th2 cell differentiation	90	0.53915	1.31208	0.00289971	0.00547148	0.00187137	7460	tags=34%, list=16%, signal=29%	MAPK14/PPP3R1/STAT5B/MAPK8/MAPK1/MAML1/NFATC3/MAPK9/JAK1/CHUK/NFKB1/PLCG1/NOTCH2/PPP3CB/RELA/PPP3CA/JAK2/MAML3/NOTCH1/DLL4/STAT6/JUN/NFATC2/MAPK3/MAML2/NOTCH3/PPP3CC/NFKBIA/JAG1/IFNGR2/MAF
hsa04145	hsa04145	Phagosome	149	0.505723	1.25332	0.00329967	0.00615291	0.00210443	14935	tags=52%, list=32%, signal=36%	RAB5A/ATP6V1A/RAB5B/EEA1/PIKFYVE/RAB7A/RAB5C/DYNC1LI2/STX12/CANX/SEC22B/STX7/TUBB/TUBA1B/ITGB1/ATP6V0A2/DYNC1I2/TUBA1C/VAMP3/TFRC/LAMP2/PIK3C3/ATP6V1D/DYNC1LI1/LAMP1/SEC61A2/ATP6V1B2/ATP6V1C1/STX18/ITGA5/TAP2/ITGAV/ATP6AP1/TLR4/ATP6V1G2/TAP1/ATP6V1E2/ATP6V1E1/TLR6/ATP6V1G1/ITGA2/SEC61A1/CD36/ITGB5/CTSS/ITGB3/ACTG1/HLA-E/ATP6V0D1/MSR1/DYNC2H1/ITGAM/FCGR2A/TLR2/OLR1/ATP6V0C/DYNC1I1/TUBA1A/NCF2/TUBB…
hsa04925	hsa04925	Aldosterone synthesis and secretion	98	0.532827	1.3005	0.00329967	0.00615291	0.00210443	16635	tags=60%, list=35%, signal=39%	ATF6B/ATF1/ATF2/CREB1/CAMK2G/CAMK2D/PRKD3/PRKCA/GNA11/ADCY6/GNAQ/ATP2B1/PRKACB/CREB3L2/ADCY9/ITPR2/CREB3L4/CALM2/PRKACA/CALM1/ATP1B1/PLCB3/CALM3/ITPR1/ATP1A1/PRKCE/CAMK1D/ADCY7/DAGLB/PLCB1/DAGLA/ITPR3/LDLR/ATP2B2/ORAI1/ATP2B4/NR4A1/GNAS/ADCY5/ADCY3/NR4A2/CACNA1C/CACNA1D/CREB3/PLCB4/CAMK4/CALML4/PRKCB/PRKD1/PDE2A/AGTR1/AGT/ATP1A2/KCNJ5/CAMK2A/ATP1B2/HSD3B2/ATF4/CACNA1F
hsa04146	hsa04146	Peroxisome	83	0.543533	1.31921	0.00369963	0.00685838	0.00234572	13413	tags=54%, list=29%, signal=39%	PEX13/PEX12/PEX19/AGPS/PEX2/SLC25A17/ABCD3/PEX1/PEX26/PEX5/IDH1/PEX10/PECR/SCP2/GNPAT/PEX11A/PEX7/PEX6/ECI2/NUDT12/AMACR/PEX14/CROT/PEX11B/CRAT/EHHADH/HSD17B4/CAT/ABCD4/ABCD1/ACOX1/NUDT19/FAR1/MPV17L/EPHX2/IDH2/PHYH/ACSL3/ACSL5/ACSL6/MPV17/DDO/GSTK1/XDH/NOS2
hsa05216	hsa05216	Thyroid cancer	37	0.614845	1.4269	0.00380609	0.00701471	0.00239919	10114	tags=57%, list=22%, signal=45%	RXRB/MAPK1/CTNNB1/MAP2K1/POLK/TFG/NRAS/NCOA4/TPR/TPM3/KRAS/TCF7L2/BRAF/CCDC6/RXRA/MAPK3/BAK1/TCF7/GADD45A/TCF7L1/CDKN1A
hsa05031	hsa05031	Amphetamine addiction	68	0.555963	1.33812	0.0039996	0.00732875	0.00250659	13820	tags=53%, list=29%, signal=37%	ATF6B/SIRT1/PPP3R1/ATF2/PPP1CB/CREB1/CAMK2G/CAMK2D/PPP1CC/PRKCA/PRKACB/PPP3CB/CREB3L2/PPP3CA/CREB3L4/HDAC1/CALM2/PRKACA/CALM1/JUN/CALM3/PPP3CC/MAOA/MAOB/STX1A/GRIN2C/GNAS/ADCY5/CACNA1C/PPP1CA/CACNA1D/DRD1/CREB3/CAMK4/CALML4/PRKCB
hsa05133	hsa05133	Pertussis	76	0.548399	1.3261	0.00479952	0.00869921	0.00297532	7865	tags=38%, list=17%, signal=32%	MAPK14/TRAF6/MAPK8/MAPK1/MAPK9/TIRAP/GNAI3/RHOA/NFKB1/IRAK4/GNAI1/ITGB1/MYD88/CASP3/CASP7/RELA/GNAI2/TICAM1/CALM2/CALM1/JUN/CFL2/CALM3/ITGA5/MAPK3/TLR4/TICAM2/IRF1/NOD1
hsa00520	hsa00520	Amino sugar and nucleotide sugar metabolism	47	0.587834	1.38647	0.0048024	0.00869921	0.00297532	7925	tags=45%, list=17%, signal=37%	FPGT/NANP/CYB5R4/PGM2/CMAS/GNPNAT1/UXS1/GFPT1/MPI/GNPDA2/GNE/GMPPB/UAP1/CYB5R3/UGDH/PGM1/PMM2/CYB5RL/PGM3/GNPDA1/CYB5R1
hsa04650	hsa04650	Natural killer cell mediated cytotoxicity	121	0.51015	1.25548	0.00709929	0.0127868	0.00437337	13958	tags=45%, list=30%, signal=32%	PPP3R1/PIK3CA/MAPK1/MAP2K1/SOS1/RAF1/PTPN11/PIK3CB/SOS2/NRAS/PRKCA/KRAS/PLCG1/CASP3/GRB2/PIK3R1/PPP3CB/BRAF/PPP3CA/PAK1/VAV2/IFNAR1/MICB/PIK3R2/TNFRSF10B/SHC1/NFATC2/MAPK3/PPP3CC/PTK2B/TNFSF10/IFNGR2/TNFRSF10A/FAS/PIK3R3/VAV3/MICA/IFNGR1/SH3BP2/HLA-E/ITGAL/PLCG2/LCP2/RAET1E/FYN/HLA-C/FCGR3A/ULBP3/FCGR3B/IFNAR2/RAET1G/KLRC4-KLRK1/ULBP2/PRKCB/SYK
hsa00020	hsa00020	Citrate cycle (TCA cycle)	30	0.621059	1.42045	0.00753239	0.0134902	0.00461395	10742	tags=60%, list=23%, signal=46%	SDHC/SUCLA2/ACLY/SDHD/CS/DLD/OGDH/IDH1/IDH3A/DLAT/DLST/PDHB/ACO2/ACO1/SUCLG2/PDHA1/IDH3B/IDH2
hsa04929	hsa04929	GnRH secretion	64	0.54991	1.3194	0.00779922	0.0138896	0.00475056	14092	tags=52%, list=30%, signal=36%	PIK3CA/MAPK1/MAP2K1/RAF1/PIK3CB/NRAS/AKT2/PRKCA/GNA11/KRAS/GNAQ/PIK3R1/AKT1/ITPR2/PIK3R2/PLCB3/ITPR1/MAPK3/PIK3R3/PLCB1/AKT3/ITPR3/TRPC1/TRPC5/ARRB1/CACNA1C/CACNA1D/GABBR1/KCNJ3/KCNN3/PLCB4/PRKCB/ARRB2
hsa04971	hsa04971	Gastric acid secretion	75	0.539699	1.30414	0.00839916	0.0148745	0.00508741	14372	tags=52%, list=31%, signal=36%	CAMK2G/CAMK2D/GNAI3/PRKCA/ADCY6/GNAI1/GNAQ/MYLK/PRKACB/ADCY9/ITPR2/GNAI2/CALM2/PRKACA/CALM1/ATP1B1/PLCB3/CALM3/ITPR1/ATP1A1/KCNJ2/MYLK4/KCNJ15/ADCY7/PLCB1/CHRM3/ITPR3/GNAS/ADCY5/ADCY3/CA2/KCNQ1/EZR/HRH2/PLCB4/CALML4/PRKCB/SLC9A1/KCNK2
hsa05412	hsa05412	Arrhythmogenic right ventricular cardiomyopathy (ARVC)	77	0.53324	1.28993	0.010199	0.0179615	0.00614325	14957	tags=57%, list=32%, signal=39%	CTNNB1/DSP/ATP2A2/DAG1/ITGB1/TCF7L2/CTNNA1/ITGA6/DMD/CDH2/PKP2/JUP/GJA1/DSC2/EMD/ITGA5/ITGA1/ITGAV/ITGA4/DSG2/ITGA2/SGCB/ITGA8/ITGB5/TCF7/SLC8A1/ITGB3/ACTG1/TCF7L1/ITGA11/CACNB2/ACTN2/CTNNA3/CACNA1C/CACNB1/RYR2/CACNA1D/ITGA10/CACNA2D1/LAMA2/ITGB8/ITGA3/ITGA7/LEF1
hsa01212	hsa01212	Fatty acid metabolism	57	0.55384	1.32129	0.0104989	0.0183877	0.00628899	13409	tags=61%, list=29%, signal=44%	HACD2/HTD2/ELOVL5/HACD3/ACADM/PPT2/SCP2/HADHA/ACADSB/ELOVL2/HADHB/ELOVL1/ACACA/HSD17B12/CBR4/CPT1A/HSD17B8/PPT1/EHHADH/HSD17B4/ACOX1/CPT2/ELOVL7/CPT1B/ACSL3/ACSL5/FADS1/ACAA2/HACD4/ACSL6/OXSM/FASN/ACADL/ELOVL6/SCD5
hsa04727	hsa04727	GABAergic synapse	89	0.519356	1.26347	0.0123988	0.0215956	0.00738619	14320	tags=46%, list=30%, signal=32%	NSF/GNAI3/PRKCA/ADCY6/GNAI1/PRKACB/GNB1/ADCY9/TRAK2/GNAI2/GNG12/PRKACA/GABARAPL2/SLC6A1/GNG10/GLUL/PLCL1/SLC38A2/GLS/ADCY7/ABAT/GNB5/SRC/GNB2/GNG2/GABRR2/GNB4/ADCY5/GABRQ/ADCY3/GNG7/CACNA1C/CACNA1D/GABRE/GABARAPL1/GABBR1/GNG5/GNG3/GABRA3/PRKCB/GABRB3
hsa05140	hsa05140	Leishmaniasis	73	0.531573	1.28316	0.0125987	0.021824	0.00746431	15337	tags=59%, list=33%, signal=40%	MAPK14/TRAF6/MAPK1/ELK1/JAK1/TAB2/NFKB1/IRAK4/TAB1/ITGB1/MYD88/RELA/MAP3K7/JAK2/JUN/MAPK3/NFKBIA/TLR4/ITGA4/IFNGR2/STAT1/IFNGR1/TGFB2/TGFB3/ITGAM/FCGR2A/TLR2/NCF2/IL12A/FCGR3A/IL1B/FCGR3B/MAPK13/NOS2/CYBB/PRKCB/HLA-DRA/HLA-DPA1/HLA-DQA1/PTGS2/MARCKSL1/FOS/FCGR2C
hsa04623	hsa04623	Cytosolic DNA-sensing pathway	58	0.54839	1.3093	0.0127	0.0218799	0.00748341	12691	tags=45%, list=27%, signal=33%	RIPK1/TBK1/ADAR/CHUK/NFKB1/POLR3B/POLR3A/POLR3E/POLR3F/RELA/POLR3C/POLR1C/MAVS/DDX58/POLR3GL/NFKBIA/POLR3D/POLR3K/IKBKB/POLR1D/POLR3G/CGAS/CXCL10/IL33/POLR2E/IL1B
hsa05219	hsa05219	Bladder cancer	41	0.579384	1.35413	0.0128141	0.0219571	0.00750983	13757	tags=66%, list=29%, signal=47%	MAPK1/VEGFA/MAP2K1/RAF1/NRAS/KRAS/DAPK1/RPS6KA5/BRAF/E2F3/RB1/CDK4/EGFR/MAPK3/DAPK3/E2F2/RASSF1/SRC/E2F1/CDKN1A/HBEGF/FGFR3/TP53/CDH1/DAPK2/EGF/THBS1
hsa05217	hsa05217	Basal cell carcinoma	63	0.537048	1.28759	0.0155984	0.0265844	0.00909247	10796	tags=44%, list=23%, signal=34%	CTNNB1/APC/POLK/DVL3/DVL2/TCF7L2/FZD5/SUFU/PTCH1/SMO/FZD4/AXIN1/GSK3B/FZD6/BAK1/FZD1/FZD3/WNT3/TCF7/GADD45A/AXIN2/DVL1/BMP4/TCF7L1/CDKN1A/SHH/WNT5A/FZD8
hsa00280	hsa00280	Valine, leucine and isoleucine degradation	48	0.558733	1.31974	0.0162049	0.0273607	0.00935797	12229	tags=58%, list=26%, signal=43%	MMUT/ALDH9A1/DBT/ACADM/DLD/ACAD8/MCCC2/HADHA/ACADSB/HIBADH/HADHB/ALDH6A1/HMGCS1/IVD/EHHADH/ABAT/ALDH2/MCEE/HIBCH/ALDH1B1/ALDH3A2/ACAA2/BCKDHB/MCCC1/OXCT1/AUH/AACS/ALDH7A1
hsa00130	hsa00130	Ubiquinone and other terpenoid-quinone biosynthesis	11	0.722036	1.4715	0.0162265	0.0273607	0.00935797	4624	tags=36%, list=10%, signal=33%	VKORC1L1/COQ7/GGCX/COQ5
hsa04918	hsa04918	Thyroid hormone synthesis	74	0.526286	1.27121	0.0167983	0.028175	0.00963646	11389	tags=41%, list=24%, signal=31%	ATF6B/ATF2/CREB1/CANX/PRKCA/ADCY6/GNAQ/PRKACB/CREB3L2/ADCY9/TTF2/ITPR2/CREB3L4/PDIA4/PRKACA/ATP1B1/PLCB3/ITPR1/ATP1A1/GSR/HSPA5/ADCY7/PLCB1/ITPR3/SLC26A4/GPX8/TTF1/GNAS/ADCY5/ADCY3
hsa01210	hsa01210	2-Oxocarboxylic acid metabolism	18	0.650065	1.42099	0.019268	0.0321472	0.010995	15110	tags=72%, list=32%, signal=49%	CS/IDH1/IDH3A/ABHD14A-ACY1/ACO2/ACO1/AADAT/IDH3B/NAGS/IDH2/GOT2/BCAT2/BCAT1
hsa04927	hsa04927	Cortisol synthesis and secretion	65	0.5304	1.27341	0.019598	0.0325266	0.0111248	14580	tags=54%, list=31%, signal=37%	ATF6B/SP1/ATF2/CREB1/GNA11/ADCY6/GNAQ/PDE8A/PRKACB/CREB3L2/ADCY9/ITPR2/CREB3L4/PRKACA/PLCB3/ITPR1/NCEH1/ADCY7/PLCB1/ITPR3/LDLR/PDE8B/ORAI1/NR4A1/GNAS/ADCY5/ADCY3/CACNA1C/CACNA1D/CREB3/PLCB4/PBX1/AGTR1/KCNK2/AGT
hsa05410	hsa05410	Hypertrophic cardiomyopathy (HCM)	90	0.50952	1.23997	0.020198	0.0333477	0.0114057	14640	tags=49%, list=31%, signal=34%	ATP2A2/PRKAA1/TPM3/PRKAG1/DAG1/ITGB1/ITGA6/DMD/PRKAB2/EMD/PRKAG2/ITGA5/PRKAB1/ITGA1/ITGAV/ITGA4/PRKAA2/ITGA2/TPM4/SGCB/ITGA8/TPM1/ITGB5/ACE/SLC8A1/ITGB3/EDN1/ACTG1/TGFB2/ITGA11/CACNB2/TGFB3/CACNA1C/CACNB1/RYR2/CACNA1D/ITGA10/CACNA2D1/LAMA2/TTN/ITGB8/ITGA3/AGT/ITGA7
hsa01200	hsa01200	Carbon metabolism	117	0.495168	1.21705	0.020498	0.0336676	0.0115151	14700	tags=51%, list=31%, signal=35%	SDHC/MMUT/RPE/SUCLA2/SDHD/ADPGK/PRPS1/CS/DLD/OGDH/IDH1/ME2/IDH3A/PSPH/DLAT/HADHA/PRPS2/DLST/PGK1/PGAM1/ADH5/RPIA/PDHB/MTHFR/ALDH6A1/ACO2/ACO1/GLUD2/PFKM/H6PD/EHHADH/ESD/CAT/AMT/SHMT2/MCEE/SUCLG2/ACOX1/HIBCH/PDHA1/PFKL/PKLR/IDH3B/IDH2/PGD/G6PD/PGAM4/ME3/ENO1/GOT2/GLUD1/RPEL1/IDNK/TKFC/HK1/PKM/SUCLG1/PSAT1/GLYCTK/TPI1
hsa00250	hsa00250	Alanine, aspartate and glutamate metabolism	34	0.580913	1.34182	0.0206454	0.033735	0.0115381	12518	tags=50%, list=27%, signal=37%	PPAT/ALDH5A1/GFPT1/CAD/GLUL/GLUD2/ADSL/GLS/ABAT/NIT2/ASPA/ASRGL1/FOLH1/GOT2/RIMKLA/GLUD1/DDO
hsa00515	hsa00515	Mannose type O-glycan biosynthesis	23	0.622642	1.39201	0.0208333	0.0338675	0.0115834	11087	tags=65%, list=24%, signal=50%	B3GALNT2/FKTN/B4GAT1/POMK/POMGNT2/RXYLT1/B4GALT3/FKRP/LARGE1/B4GALT1/CRPPA/FUT4/ST3GAL3/POMT1/B3GAT2
hsa05146	hsa05146	Amoebiasis	101	0.502239	1.22724	0.0218978	0.0354164	0.0121132	14471	tags=52%, list=31%, signal=36%	PIK3CA/RAB5A/RAB5B/RAB7A/RAB5C/PIK3CB/ACTN4/PRKCA/GNA11/NFKB1/GNAQ/PRKACB/CASP3/PIK3R1/RELA/PTK2/VCL/LAMC1/ACTN1/PIK3R2/COL4A1/PRKACA/PLCB3/IL1R1/TLR4/COL4A2/SERPINB9/PIK3R3/PLCB1/TGFB2/FN1/TGFB3/ITGAM/COL3A1/GNAS/TLR2/COL4A4/LAMA3/LAMB3/IL12A/IL1B/GNA14/COL4A5/LAMA2/NOS2/SERPINB6/LAMA4/PLCB4/PRKCB/COL1A2/COL1A1/GNAL/LAMB1
hsa04932	hsa04932	Non-alcoholic fatty liver disease (NAFLD)	145	0.480617	1.18972	0.0229977	0.0370065	0.012657	8090	tags=37%, list=17%, signal=30%	PIK3CA/ITCH/MAPK8/EIF2AK3/PIK3CB/MAPK9/SDHC/NDUFS1/AKT2/ADIPOR1/CASP8/CDC42/NFKB1/PRKAA1/PRKAG1/EIF2S1/SDHD/MLX/CASP3/PIK3R1/CASP7/RELA/BCL2L11/ERN1/COX7A2L/AKT1/ADIPOR2/PPARA/PRKAB2/IL6R/GSK3A/PIK3R2/IRS1/NDUFA5/JUN/RXRA/INSR/PRKAG2/PRKAB1/GSK3B/UQCRC2/XBP1/CYCS/PRKAA2/NDUFB6/IRS2/CEBPA/NDUFB4/MLXIP/FAS/NDUFS2/TNFRSF1A/PIK3R3
hsa05030	hsa05030	Cocaine addiction	49	0.546811	1.29332	0.0242024	0.0387483	0.0132528	10813	tags=43%, list=23%, signal=33%	ATF6B/ATF2/CREB1/GNAI3/NFKB1/GNAI1/PRKACB/CREB3L2/RELA/CREB3L4/GNAI2/CDK5R1/PRKACA/JUN/MAOA/MAOB/CDK5/GRIN2C/DLG4/GNAS/ADCY5
hsa00534	hsa00534	Glycosaminoglycan biosynthesis - heparan sulfate / heparin	24	0.611616	1.37301	0.0246415	0.039253	0.0134254	11841	tags=54%, list=25%, signal=41%	EXT2/HS2ST1/EXTL2/NDST1/NDST2/EXT1/GLCE/EXTL3/XYLT2/HS6ST1/HS3ST3A1/XYLT1/HS3ST1
hsa04961	hsa04961	Endocrine and other factor-regulated calcium reabsorption	50	0.543768	1.2876	0.0249025	0.0394704	0.0134998	11776	tags=46%, list=25%, signal=35%	PRKCA/CLTC/ADCY6/AP2B1/GNAQ/ATP2B1/PRKACB/ADCY9/DNM2/RAB11A/AP2A2/AP2A1/PRKACA/ATP1B1/PLCB3/ATP1A1/AP2M1/PLCB1/SLC8A1/KL/GNAS/VDR/DNM3
hsa00062	hsa00062	Fatty acid elongation	27	0.59915	1.35898	0.025073	0.039543	0.0135246	13239	tags=70%, list=28%, signal=51%	HACD2/ELOVL5/HACD3/PPT2/HADHA/THEM4/ELOVL2/HADHB/ELOVL1/HSD17B12/PPT1/THEM5/ELOVL7/ACOT7/ACAA2/HACD4/ACOT2/ACOT4/ELOVL6
hsa05032	hsa05032	Morphine addiction	91	0.503546	1.22598	0.0265973	0.0415379	0.0142069	18196	tags=63%, list=39%, signal=38%	GNAI3/PRKCA/ADCY6/GNAI1/PDE8A/PRKACB/GNB1/ADCY9/GNAI2/GRK2/GNG12/PDE3B/PRKACA/GNG10/PDE7A/GRK6/GRK5/ADCY7/GNB5/GNB2/PDE8B/GNG2/GABRR2/GNB4/GNAS/ADCY5/GABRQ/ADCY3/GNG7/ARRB1/GABRE/DRD1/PDE3A/GABBR1/PDE7B/GNG5/PDE4B/GNG3/KCNJ3/GABRA3/ADORA1/PRKCB/ARRB2/PDE2A/GABRB3/PDE4A/PDE1A/KCNJ5/GRK4/PDE1B/GRK3/PDE4C/PDE4D/PDE10A/GNG11/GABRG2/PDE11A
hsa00561	hsa00561	Glycerolipid metabolism	61	0.528352	1.26489	0.0266	0.0415379	0.0142069	14653	tags=57%, list=31%, signal=40%	AGPAT1/AGPAT3/ALDH9A1/LCLAT1/PLPP3/AGK/MBOAT1/DGKD/GPAT4/LPIN2/DGKQ/DGKZ/LPIN3/DGKH/GPAM/LPIN1/LIPG/PNPLA3/AGPAT5/PNPLA2/PLPP5/ALDH2/ALDH1B1/ALDH3A2/DGKE/DGKG/GPAT3/ALDH7A1/MBOAT2/GK/AGPAT4/MGLL/TKFC/GLYCTK/DGKB
hsa04724	hsa04724	Glutamatergic synapse	114	0.490706	1.20497	0.0293971	0.0456807	0.0156238	13820	tags=47%, list=29%, signal=34%	PPP3R1/MAPK1/GNAI3/PRKCA/ADCY6/GNAI1/GNAQ/PRKACB/PPP3CB/GNB1/ADCY9/ITPR2/SHANK2/PPP3CA/JMJD7-PLA2G4B/GNAI2/SHANK3/GRK2/GNG12/PRKACA/PLCB3/GNG10/ITPR1/GLUL/MAPK3/PPP3CC/PLD2/HOMER2/SLC38A2/GLS/ADCY7/PLCB1/GNB5/GNB2/ITPR3/PLD1/GRIN2C/GNG2/GNB4/TRPC1/DLG4/GNAS/ADCY5/ADCY3/GNG7/CACNA1C/CACNA1D/SLC1A3/GNG5/GNG3/KCNJ3/HOMER1/PLCB4/PRKCB
hsa04216	hsa04216	Ferroptosis	40	0.554342	1.29336	0.0333367	0.0515499	0.0176312	13683	tags=57%, list=29%, signal=41%	PCBP2/GCLC/PCBP1/NCOA4/SLC11A2/SLC40A1/TFRC/ATG5/GCLM/VDAC2/SLC39A14/SLC39A8/VDAC3/ATG7/MAP1LC3B/LPCAT3/ACSL3/ACSL5/TP53/ACSL6/GSS/CYBB/SLC3A2
hsa00514	hsa00514	Other types of O-glycan biosynthesis	22	0.610128	1.35836	0.0346434	0.0533105	0.0182334	13129	tags=68%, list=28%, signal=49%	POFUT1/GXYLT1/B3GLCT/POGLUT1/OGT/POFUT2/B4GALT3/B4GALT1/EOGT/ST6GAL1/COLGALT1/ST3GAL3/POMT1/B4GALT2/RFNG
hsa00100	hsa00100	Steroid biosynthesis	19	0.623791	1.37179	0.0350234	0.0536349	0.0183443	17185	tags=79%, list=37%, signal=50%	SOAT1/LIPA/DHCR24/CYP51A1/FDFT1/HSD17B7/SC5D/SQLE/LSS/MSMO1/DHCR7/NSDHL/CEL/CYP2R1/CYP27B1
hsa05414	hsa05414	Dilated cardiomyopathy (DCM)	95	0.495013	1.20676	0.0364963	0.0556218	0.0190239	14640	tags=46%, list=31%, signal=32%	ATP2A2/TPM3/ADCY6/DAG1/ITGB1/PRKACB/ADCY9/ITGA6/DMD/PRKACA/EMD/ITGA5/ITGA1/ITGAV/ITGA4/ITGA2/TPM4/SGCB/ITGA8/TPM1/ITGB5/ADCY7/SLC8A1/ITGB3/ACTG1/TGFB2/ITGA11/CACNB2/TGFB3/GNAS/ADCY5/ADCY3/CACNA1C/CACNB1/RYR2/CACNA1D/ITGA10/CACNA2D1/LAMA2/TTN/ITGB8/ITGA3/AGT/ITGA7
hsa04930	hsa04930	Type II diabetes mellitus	46	0.538612	1.26864	0.036722	0.055698	0.01905	17896	tags=67%, list=38%, signal=42%	PIK3CA/MAPK8/MAPK1/PIK3CB/MAPK9/PIK3R1/SOCS4/MTOR/PIK3R2/IRS1/INSR/MAPK3/PRKCD/IRS2/PRKCE/PIK3R3/IKBKB/PKLR/SLC2A2/CACNA1C/CACNA1D/MAPK10/HK1/PKM/SOCS2/TNF/SLC2A4/PRKCZ/HKDC1/PDX1/HK2
hsa00532	hsa00532	Glycosaminoglycan biosynthesis - chondroitin sulfate / dermatan sulfate	20	0.616463	1.36032	0.0370257	0.0558912	0.019116	14066	tags=65%, list=30%, signal=46%	CSGALNACT2/CHST14/CHSY1/DSE/XYLT2/CHST15/CHST12/CSGALNACT1/XYLT1/CHST3/CHST11/CHPF2/CHSY3
hsa04966	hsa04966	Collecting duct acid secretion	27	0.584371	1.32546	0.0376599	0.056579	0.0193513	12605	tags=48%, list=27%, signal=35%	ATP6V1A/ATP6V0A2/ATP6V1D/SLC12A7/ATP6V1B2/ATP6V1C1/ATP6V1G2/ATP6V1E2/ATP6V1E1/ATP6V1G1/ATP6V0D1/ATP6V0C/CA2
hsa00270	hsa00270	Cysteine and methionine metabolism	48	0.534017	1.26136	0.040012	0.0598293	0.0204629	15312	tags=60%, list=33%, signal=41%	GCLC/MRI1/MTR/AHCYL1/AHCYL2/MAT2B/MTAP/ENOPH1/MAT2A/APIP/GCLM/DNMT3B/DNMT3A/LDHA/AMD1/SMS/KYAT3/DNMT1/AHCY/KYAT1/BHMT2/LDHAL6B/GOT2/GSS/BCAT2/PSAT1/BCAT1/BHMT/MDH2
hsa04726	hsa04726	Serotonergic synapse	113	0.482868	1.1855	0.0426957	0.0635425	0.0217329	15627	tags=50%, list=33%, signal=33%	MAPK1/MAP2K1/RAF1/NRAS/GNAI3/PRKCA/GNAI1/KRAS/GNAQ/PRKACB/CASP3/GNB1/BRAF/ITPR2/JMJD7-PLA2G4B/GNAI2/GNG12/PRKACA/PLCB3/GNG10/ITPR1/MAPK3/APP/CYP4X1/MAOA/MAOB/PLCB1/GNB5/GNB2/ITPR3/GNG2/GNB4/TRPC1/GNAS/ADCY5/TPH1/GNG7/CACNA1C/CACNA1D/HTR4/PTGS1/GNG5/GNG3/KCNJ3/ALOX5/PLCB4/PRKCB/ALOX12/HTR1D/GABRB3/PLA2G4A/PTGS2/DUSP1/ALOX15/KCNJ5/HTR7
hsa00511	hsa00511	Other glycan degradation	18	0.615456	1.34533	0.0479152	0.0709772	0.0242758	7477	tags=50%, list=16%, signal=42%	NEU1/NEU3/GLB1/MANBA/MAN2B2/ENGASE/GBA2/FUCA1/AGA
CDC5L, cell division cycle 5 like; KEGG, Kyoto Encyclopedia of Genes and Genomes.
